# Supplementary material
Source: MDPI journal article supplement (https://www.mdpi.com/2077-0472/11/10/987)
Supplement: s1 [file s1]

|      | pH  | EC <sup>1</sup><br>(dS/m) | Organic<br>matter (%) | Phosphate<br>(mg/kg) | Potassium<br>(mg/kg) | Calcium<br>(mg/kg) | Magnesium<br>(mg/kg) | Iron<br>(mg/kg) | Manganese<br>(mg/kg) | Copper<br>(mg/kg) | Zinc<br>(mg/kg) | Cadmium<br>(mg/kg) | Nickel<br>(mg/kg) | Lead<br>(mg/kg) |
|------|-----|---------------------------|-----------------------|----------------------|----------------------|--------------------|----------------------|-----------------|----------------------|-------------------|-----------------|--------------------|-------------------|-----------------|
| OK 1 | 6.0 | 0.36                      | 1.4                   | 193                  | 201                  | 13893              | 351                  | 72              | 155                  | 3.2               | 61.4            | 0.07               | 1.3               | 0.3             |
| OK 2 | 6.3 | 0.42                      | 1.3                   | 197                  | 225                  | 13599              | 348                  | 60              | 142                  | 2.9               | 57.8            | 0.06               | 1.2               | 0.3             |
| OK 3 | 6.9 | 0.24                      | 0.8                   | 383                  | 232                  | 15622              | 501                  | 58              | 95                   | 3.3               | 12.6            | 0.03               | 1.2               | 0.5             |
| NG 1 | 6.3 | 2.02                      | 1.2                   | 195                  | 2463                 | 13266              | 318                  | 77              | 190                  | 2.5               | 59.8            | 0.06               | 1.2               | 0.7             |
| NG 2 | 6.6 | 0.25                      | 1.3                   | 193                  | 231                  | 11983              | 345                  | 66              | 96                   | 2.2               | 17.9            | 0.02               | 1.3               | 0.7             |
| NG 3 | 5.4 | 1.32                      | 4.6                   | 191                  | 360                  | 7480               | 272                  | 233             | 53                   | 2.6               | 22.7            | 0.26               | 1.5               | 1.0             |

<sup>1</sup> EC, electrical conductivity
