# Supplementary material
Source: MDPI journal article supplement (https://www.mdpi.com/2077-0472/11/10/987)
Supplement: s1 [file s1]

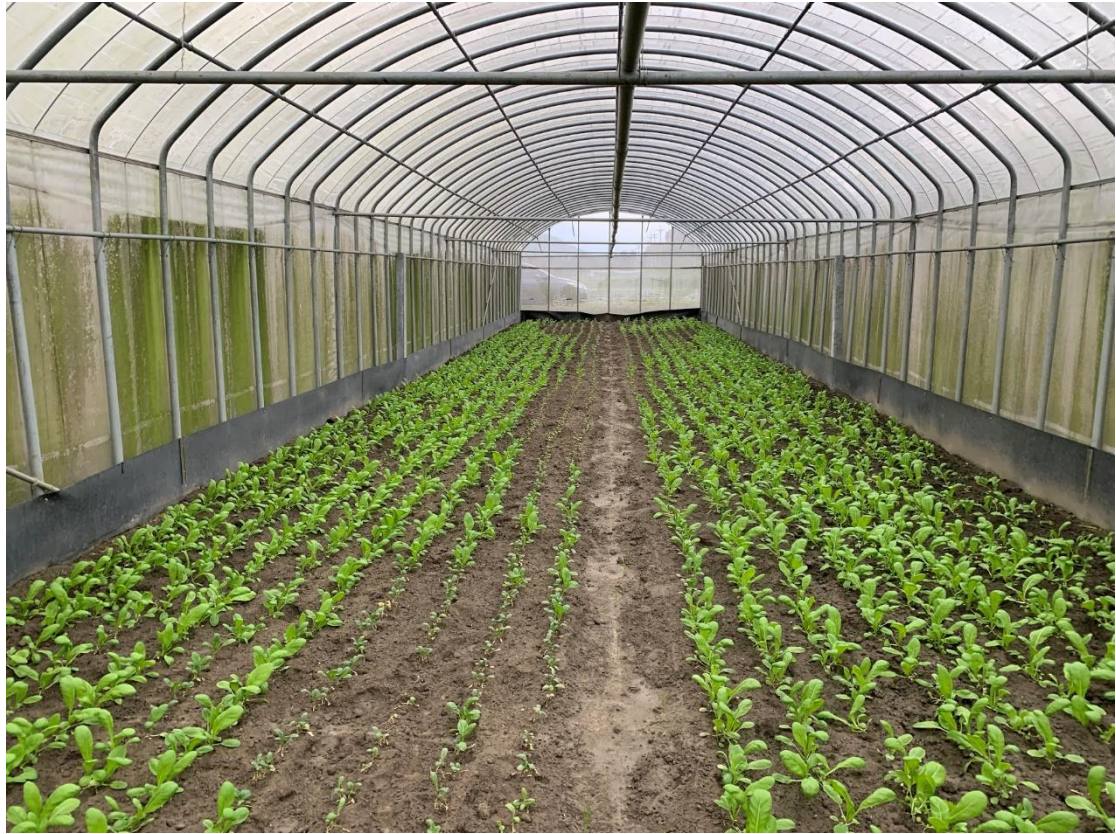

**Figure S1.** Organic greenhouse cultivation of mustard (*Brassica juncea* cv. *yunanjen*).

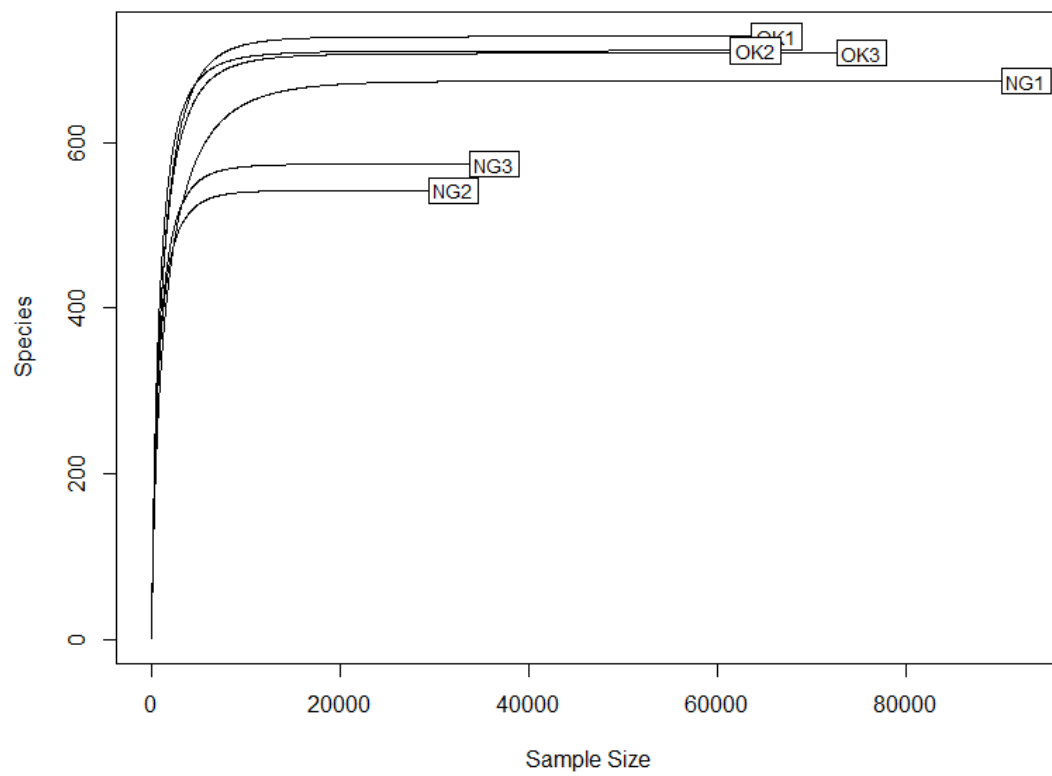

**Figure S2.** Rarefaction analysis.

All samples recovered the majority of taxa present in each sample. The graph validates the minimum rarefied number used for downstream analysis.

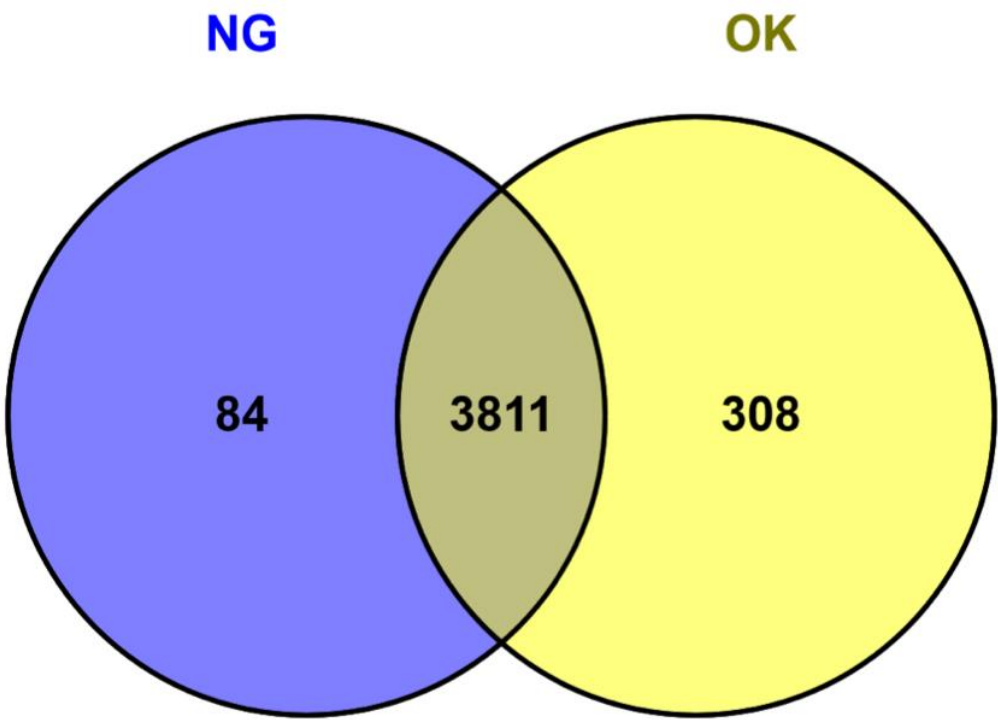

**Figure S3.** Differences in bacterial operational taxonomic units (OTUs) between roots from healthy (OK) and diseased (NG) plants.

Venn diagram shows numbers of unique and overlapping OTUs that are statistically different in relative abundance between OK and NG roots.

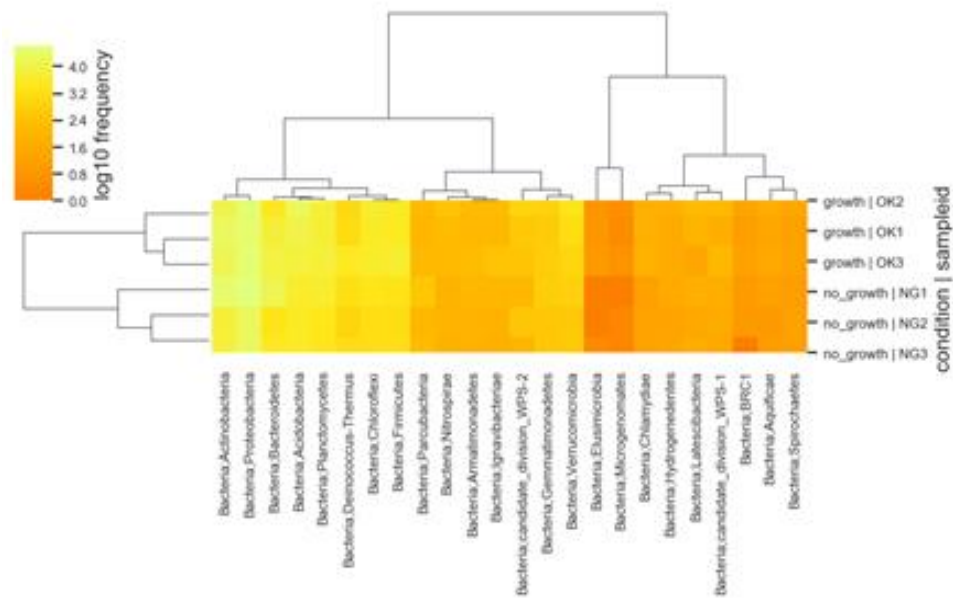

**Figure S4.** Heatmap showing the relative abundance of bacterial OTUs at phylum level.

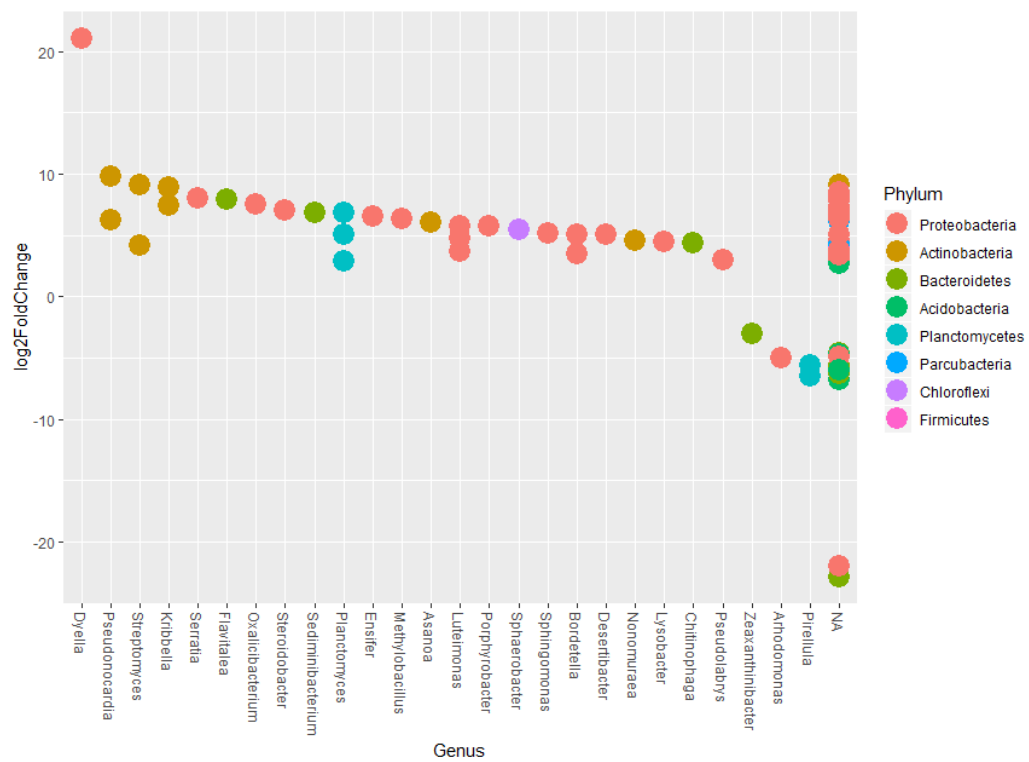

**Figure S5.** Significantly different genera between conditions ( $\log_2$  fold change OK to NG).
