# Supplementary material
Source: MDPI journal article supplement (https://www.mdpi.com/2077-0472/11/10/987)
Supplement: s1 [file s1]

Archive with 6 entries (6 files):
- agriculture-1389916-supplementary.pdf
- Table S1 NGS OTU abundance.xlsx
- Table S2 Statistical test on OTU relative abundance.xlsx
- Table S3 Physicochemical properties.pdf
- Table S4 Beta diversity correlation.xlsx
- Table S5 Statistical test on Bacillus genus.xlsx
