# Supplementary material
Source: MDPI journal article supplement (https://www.mdpi.com/2077-0472/11/10/987)
Supplement: s1 [file s1 › Table S1 NGS OTU abundance.xlsx]

## Sheet: 工作表1
name	taxID	Absolute.OK1	Relative.OK1	Absolute.OK2	Relative.OK2	Absolute.OK3	Relative.OK3	Absolute.NG1	Relative.NG1	Absolute.NG2	Relative.NG2	Absolute.NG3	Relative.NG3
[Clostridium] cellulosi	29343	11	0.0001994	30	0.0005197	4	7.378e-05	0	0	0	0	3	0.0001138
[Clostridium] ultunense	45497	0	0	0	0	7	0.0001291	0	0	0	0	0	0
[Eubacterium] eligens	39485	2	3.626e-05	2	3.465e-05	0	0	0	0	0	0	1	3.792e-05
[Eubacterium] hallii	39488	43	0.0007795	52	0.0009008	20	0.0003689	9	0.0001679	1	4.188e-05	17	0.0006446
[Eubacterium] minutum	76124	2	3.626e-05	8	0.0001386	1	1.844e-05	5	9.33e-05	0	0	2	7.584e-05
[Eubacterium] sulci	143393	1	1.813e-05	0	0	0	0	0	0	0	0	0	0
[Mycobacterium] stephanolepidis	1520670	3	5.438e-05	4	6.929e-05	2	3.689e-05	13	0.0002426	4	0.0001675	1	3.792e-05
[Polyangium] brachysporum	413882	33	0.0005982	66	0.001143	63	0.001162	5	9.33e-05	5	0.0002094	15	0.0005688
Acetoanaerobium sticklandii	1511	10	0.0001813	7	0.0001213	11	0.0002029	4	7.464e-05	2	8.376e-05	3	0.0001138
Acetohalobium arabaticum	28187	29	0.0005257	44	0.0007622	38	0.0007009	15	0.0002799	13	0.0005444	9	0.0003413
Acetomicrobium mobile	97477	8	0.000145	23	0.0003984	9	0.000166	14	0.0002612	10	0.0004188	11	0.0004171
Achromobacter xylosoxidans	85698	0	0	0	0	0	0	0	0	0	0	1	3.792e-05
Acidiferrobacter sp. SPIII_3	1281578	10	0.0001813	12	0.0002079	0	0	5	9.33e-05	6	0.0002513	3	0.0001138
Acidihalobacter ferrooxidans	1765967	0	0	0	0	0	0	1	1.866e-05	0	0	0	0
Acidimicrobium ferrooxidans	53635	12	0.0002175	10	0.0001732	28	0.0005165	13	0.0002426	11	0.0004607	9	0.0003413
Acidisphaera sp. G45-3	1969806	55	0.000997	4	6.929e-05	10	0.0001844	23	0.0004292	18	0.0007538	3	0.0001138
Acidithiobacillus caldus	33059	0	0	3	5.197e-05	0	0	0	0	0	0	0	0
Acidobacteriaceae bacterium SBC82	2211140	2	3.626e-05	0	0	0	0	0	0	1	4.188e-05	0	0
Acidobacterium capsulatum	33075	0	0	0	0	0	0	1	1.866e-05	0	0	0	0
Acidothermus cellulolyticus	28049	48	0.0008701	58	0.001005	85	0.001568	36	0.0006718	49	0.002052	62	0.002351
Acidovorax carolinensis	553814	3	5.438e-05	0	0	1	1.844e-05	0	0	0	0	0	0
Acinetobacter radioresistens	40216	3	5.438e-05	3	5.197e-05	3	5.533e-05	12	0.0002239	1	4.188e-05	5	0.0001896
Acinetobacter sp. ADP1	62977	379	0.006871	283	0.004902	427	0.007876	932	0.01739	271	0.01135	426	0.01615
Actinoalloteichus hymeniacidonis	340345	1	1.813e-05	1	1.732e-05	6	0.0001107	9	0.0001679	1	4.188e-05	2	7.584e-05
Actinobacillus succinogenes	67854	3	5.438e-05	1	1.732e-05	1	1.844e-05	1	1.866e-05	0	0	3	0.0001138
Actinobacteria bacterium IMCC26077	1848755	3	5.438e-05	14	0.0002425	3	5.533e-05	2	3.732e-05	4	0.0001675	4	0.0001517
Actinobacteria bacterium IMCC26256	1650658	203	0.00368	388	0.006721	227	0.004187	128	0.002388	86	0.003601	84	0.003185
Actinomadura amylolytica	1411117	314	0.005692	57	0.0009874	192	0.003541	365	0.006811	44	0.001843	30	0.001138
Actinomyces radingae	131110	1	1.813e-05	0	0	1	1.844e-05	0	0	0	0	0	0
Actinomyces sp. 2129	2321394	3	5.438e-05	3	5.197e-05	2	3.689e-05	3	5.598e-05	1	4.188e-05	0	0
Actinomyces sp. oral taxon 414	712122	0	0	0	0	0	0	0	0	1	4.188e-05	0	0
Actinomyces sp. VUL4_3	1912795	1	1.813e-05	1	1.732e-05	10	0.0001844	1	1.866e-05	5	0.0002094	1	3.792e-05
Actinomyces sp. Z16	2079536	2175	0.03943	3968	0.06874	1403	0.02588	884	0.0165	732	0.03065	716	0.02715
Actinoplanes derwentensis	113562	0	0	3	5.197e-05	1	1.844e-05	0	0	0	0	0	0
Actinoplanes missouriensis	1866	4	7.251e-05	0	0	1	1.844e-05	0	0	0	0	1	3.792e-05
Actinopolymorpha singaporensis	117157	5	9.064e-05	12	0.0002079	1	1.844e-05	1	1.866e-05	2	8.376e-05	1	3.792e-05
Actinotignum schaalii	59505	17	0.0003082	22	0.0003811	19	0.0003505	5	9.33e-05	7	0.0002931	13	0.000493
Aequorivita sublithincola	101385	1	1.813e-05	1	1.732e-05	0	0	0	0	0	0	0	0
Aeribacillus pallidus	33936	0	0	0	0	0	0	0	0	1	4.188e-05	1	3.792e-05
Aerococcaceae bacterium ZY16052	2036206	2	3.626e-05	1	1.732e-05	0	0	0	0	0	0	0	0
Aerococcus christensenii	87541	0	0	0	0	0	0	0	0	0	0	1	3.792e-05
Aerococcus urinae	1376	0	0	2	3.465e-05	1	1.844e-05	0	0	0	0	0	0
Aeromicrobium choanae	1736691	0	0	0	0	0	0	0	0	1	4.188e-05	0	0
Aeromonas schubertii	652	44	0.0007976	32	0.0005543	11	0.0002029	9	0.0001679	13	0.0005444	14	0.0005309
Aeromonas veronii	654	0	0	1	1.732e-05	0	0	2	3.732e-05	0	0	1	3.792e-05
Agarilytica rhodophyticola	1737490	5	9.064e-05	5	8.661e-05	30	0.0005533	26	0.0004852	14	0.0005863	33	0.001251
Agarivorans gilvus	680279	1	1.813e-05	0	0	2	3.689e-05	1	1.866e-05	1	4.188e-05	3	0.0001138
Aggregatibacter actinomycetemcomitans	714	1	1.813e-05	0	0	1	1.844e-05	0	0	0	0	0	0
Agromyces flavus	589382	27	0.0004895	31	0.000537	50	0.0009222	62	0.001157	26	0.001089	43	0.001631
Agromyces sp. 30A	2080742	37	0.0006707	30	0.0005197	89	0.001642	33	0.0006158	17	0.0007119	31	0.001176
Ahniella affigens	2021234	4	7.251e-05	14	0.0002425	2	3.689e-05	0	0	0	0	3	0.0001138
Akkermansia glycaniphila	1679444	12	0.0002175	6	0.0001039	5	9.222e-05	0	0	0	0	0	0
Alcaligenes faecalis	511	0	0	1	1.732e-05	0	0	0	0	0	0	1	3.792e-05
Alcanivorax pacificus	1306787	1	1.813e-05	0	0	1	1.844e-05	4	7.464e-05	0	0	0	0
Algoriphagus machipongonensis	388413	42	0.0007614	9	0.0001559	52	0.0009591	11	0.0002053	18	0.0007538	12	0.000455
Alicyclobacillus acidocaldarius	405212	164	0.002973	26	0.0004504	63	0.001162	323	0.006027	23	0.0009632	24	0.0009101
Alkalilimnicola ehrlichii	351052	39	0.000707	32	0.0005543	45	0.00083	332	0.006195	34	0.001424	41	0.001555
Alkaliphilus metalliredigens	208226	5	9.064e-05	0	0	0	0	0	0	0	0	2	7.584e-05
Alkaliphilus oremlandii	461876	1	1.813e-05	0	0	3	5.533e-05	1	1.866e-05	0	0	0	0
Alkalitalea saponilacus	889453	0	0	3	5.197e-05	0	0	6	0.000112	1	4.188e-05	3	0.0001138
Allochromatium vinosum	1049	5	9.064e-05	1	1.732e-05	3	5.533e-05	3	5.598e-05	5	0.0002094	6	0.0002275
Allofrancisella guangzhouensis	594679	0	0	2	3.465e-05	0	0	0	0	0	0	0	0
Allokutzneria albata	211114	0	0	0	0	0	0	1	1.866e-05	0	0	0	0
alpha proteobacterium HIMB5	859653	1	1.813e-05	0	0	2	3.689e-05	1	1.866e-05	2	8.376e-05	0	0
alpha proteobacterium HIMB59	744985	0	0	1	1.732e-05	0	0	0	0	1	4.188e-05	1	3.792e-05
Altererythrobacter atlanticus	1267766	1	1.813e-05	0	0	1	1.844e-05	0	0	0	0	0	0
Altererythrobacter dongtanensis	692370	0	0	0	0	0	0	8	0.0001493	1	4.188e-05	0	0
Altererythrobacter epoxidivorans	361183	0	0	0	0	0	0	1	1.866e-05	0	0	0	0
Altererythrobacter ishigakiensis	476157	2	3.626e-05	1	1.732e-05	1	1.844e-05	2	3.732e-05	1	4.188e-05	1	3.792e-05
Altererythrobacter marensis	543877	4	7.251e-05	1	1.732e-05	5	9.222e-05	9	0.0001679	5	0.0002094	6	0.0002275
Altererythrobacter namhicola	645517	0	0	0	0	1	1.844e-05	0	0	0	0	0	0
Altererythrobacter sp. B11	2060312	18	0.0003263	11	0.0001906	29	0.0005349	31	0.0005785	21	0.0008794	17	0.0006446
Altererythrobacter sp. ZODW24	2185142	0	0	0	0	0	0	0	0	1	4.188e-05	0	0
Aminobacterium colombiense	81468	2	3.626e-05	1	1.732e-05	0	0	0	0	0	0	0	0
Amphibacillus xylanus	1449	2	3.626e-05	2	3.465e-05	4	7.378e-05	2	3.732e-05	1	4.188e-05	3	0.0001138
Amycolatopsis albispora	1804986	1	1.813e-05	0	0	1	1.844e-05	0	0	0	0	0	0
Amycolatopsis mediterranei	33910	0	0	0	0	0	0	1	1.866e-05	0	0	0	0
Amycolatopsis methanolica	1814	2	3.626e-05	0	0	0	0	5	9.33e-05	1	4.188e-05	1	3.792e-05
Anaerolinea thermophila	167964	623	0.01129	823	0.01426	799	0.01474	288	0.005374	275	0.01152	253	0.009594
Anaerolineaceae bacterium oral taxon 439	1889813	5	9.064e-05	16	0.0002772	12	0.0002213	8	0.0001493	7	0.0002931	1	3.792e-05
Anaeromyxobacter sp. Fw109-5	404589	323	0.005855	444	0.007691	334	0.006161	226	0.004217	161	0.006742	135	0.005119
Anaerostipes hadrus	649756	0	0	1	1.732e-05	0	0	0	0	0	0	0	0
Anderseniella sp. Alg231-50	1922226	3	5.438e-05	2	3.465e-05	3	5.533e-05	3	5.598e-05	0	0	1	3.792e-05
Aneurinibacillus soli	1500254	6	0.0001088	8	0.0001386	19	0.0003505	7	0.0001306	5	0.0002094	20	0.0007584
Aneurinibacillus sp. XH2	1450761	13	0.0002357	27	0.0004677	29	0.0005349	35	0.0006531	23	0.0009632	29	0.0011
Anoxybacillus amylolyticus	294699	1	1.813e-05	3	5.197e-05	0	0	0	0	0	0	0	0
Anoxybacillus flavithermus	33934	3	5.438e-05	0	0	4	7.378e-05	1	1.866e-05	2	8.376e-05	5	0.0001896
Anoxybacillus gonensis	198467	1	1.813e-05	0	0	3	5.533e-05	2	3.732e-05	1	4.188e-05	0	0
Aquabacterium olei	1296669	0	0	0	0	0	0	2	3.732e-05	0	0	0	0
Aquifex aeolicus	63363	0	0	0	0	0	0	0	0	0	0	1	3.792e-05
Aquimarina sp. AD10	1714849	1	1.813e-05	0	0	0	0	0	0	0	0	0	0
Arachidicoccus sp. BS20	1850526	2	3.626e-05	3	5.197e-05	4	7.378e-05	13	0.0002426	7	0.0002931	3	0.0001138
Arachidicoccus sp. KIS59-12	2341117	4	7.251e-05	14	0.0002425	1	1.844e-05	2	3.732e-05	1	4.188e-05	0	0
Arcanobacterium haemolyticum	28264	1	1.813e-05	1	1.732e-05	0	0	1	1.866e-05	0	0	0	0
Arcobacter nitrofigilis	28199	0	0	0	0	0	0	1	1.866e-05	0	0	1	3.792e-05
Arcticibacterium luteifluviistationis	1784714	8	0.000145	6	0.0001039	8	0.0001476	8	0.0001493	7	0.0002931	6	0.0002275
Arsenicicoccus sp. oral taxon 190	1658671	1	1.813e-05	1	1.732e-05	0	0	0	0	0	0	0	0
Asticcacaulis excentricus	78587	1	1.813e-05	2	3.465e-05	1	1.844e-05	1	1.866e-05	1	4.188e-05	2	7.584e-05
Atopobium parvulum	1382	10	0.0001813	3	5.197e-05	5	9.222e-05	4	7.464e-05	0	0	3	0.0001138
Auraticoccus monumenti	675864	6	0.0001088	2	3.465e-05	2	3.689e-05	0	0	6	0.0002513	1	3.792e-05
Auritidibacter sp. NML130574	2170745	122	0.002212	64	0.001109	142	0.002619	35	0.0006531	31	0.001298	21	0.0007963
Azoarcus sp. KH32C	748247	0	0	0	0	0	0	1	1.866e-05	0	0	0	0
Azoarcus sp. SY39	2067960	0	0	1	1.732e-05	0	0	0	0	0	0	0	0
Azorhizobium caulinodans	7	1406	0.02549	2409	0.04173	716	0.01321	521	0.009722	250	0.01047	530	0.0201
Azospira oryzae	146939	1	1.813e-05	23	0.0003984	1	1.844e-05	0	0	0	0	1	3.792e-05
Azotobacter chroococcum	353	23	0.0004169	30	0.0005197	34	0.0006271	15	0.0002799	5	0.0002094	12	0.000455
Bacillus altitudinis	293387	7	0.0001269	2	3.465e-05	1	1.844e-05	3	5.598e-05	1	4.188e-05	3	0.0001138
Bacillus amyloliquefaciens	1390	3	5.438e-05	1	1.732e-05	1	1.844e-05	0	0	0	0	2	7.584e-05
Bacillus anthracis	1392	10	0.0001813	11	0.0001906	31	0.0005718	12	0.0002239	15	0.0006282	32	0.001213
Bacillus atrophaeus	1452	1	1.813e-05	1	1.732e-05	2	3.689e-05	1	1.866e-05	0	0	0	0
Bacillus butanolivorans	421767	0	0	0	0	1	1.844e-05	0	0	0	0	0	0
Bacillus cellulosilyticus	1413	1	1.813e-05	0	0	3	5.533e-05	0	0	0	0	1	3.792e-05
Bacillus cereus	1396	20	0.0003626	20	0.0003465	28	0.0005165	9	0.0001679	7	0.0002931	11	0.0004171
Bacillus clausii	79880	12	0.0002175	12	0.0002079	51	0.0009407	5	9.33e-05	8	0.000335	5	0.0001896
Bacillus coagulans	1398	36	0.0006526	29	0.0005024	66	0.001217	12	0.0002239	2	8.376e-05	8	0.0003034
Bacillus halodurans	86665	2	3.626e-05	1	1.732e-05	2	3.689e-05	0	0	0	0	1	3.792e-05
Bacillus horikoshii	79883	3	5.438e-05	5	8.661e-05	15	0.0002767	5	9.33e-05	5	0.0002094	2	7.584e-05
Bacillus lehensis	300825	1	1.813e-05	0	0	0	0	0	0	0	0	0	0
Bacillus licheniformis	1402	1	1.813e-05	7	0.0001213	5	9.222e-05	2	3.732e-05	2	8.376e-05	7	0.0002654
Bacillus megaterium	1404	67	0.001215	50	0.0008661	126	0.002324	41	0.0007651	19	0.0007957	36	0.001365
Bacillus muralis	264697	0	0	0	0	0	0	0	0	1	4.188e-05	0	0
Bacillus oceanisediminis	665099	20	0.0003626	20	0.0003465	26	0.0004796	14	0.0002612	13	0.0005444	7	0.0002654
Bacillus pseudomycoides	64104	3	5.438e-05	3	5.197e-05	6	0.0001107	5	9.33e-05	2	8.376e-05	7	0.0002654
Bacillus pumilus	1408	0	0	0	0	1	1.844e-05	0	0	0	0	1	3.792e-05
Bacillus safensis	561879	0	0	0	0	0	0	1	1.866e-05	0	0	0	0
Bacillus sp. 1NLA3E	666686	8	0.000145	21	0.0003638	23	0.0004242	7	0.0001306	5	0.0002094	1	3.792e-05
Bacillus sp. DM2	2267265	2	3.626e-05	2	3.465e-05	2	3.689e-05	2	3.732e-05	0	0	4	0.0001517
Bacillus sp. FJAT-45348	2011012	1	1.813e-05	0	0	3	5.533e-05	2	3.732e-05	0	0	0	0
Bacillus sp. Lzh-5	2049935	1	1.813e-05	0	0	1	1.844e-05	1	1.866e-05	1	4.188e-05	0	0
Bacillus sp. Y1	352858	6	0.0001088	4	6.929e-05	5	9.222e-05	2	3.732e-05	1	4.188e-05	1	3.792e-05
Bacillus sp. ZY-1-1	2093834	0	0	0	0	1	1.844e-05	0	0	0	0	0	0
Bacillus subtilis	1423	1	1.813e-05	0	0	1	1.844e-05	1	1.866e-05	4	0.0001675	1	3.792e-05
Bacillus thermoamylovorans	35841	10	0.0001813	43	0.0007449	27	0.000498	6	0.000112	5	0.0002094	7	0.0002654
Bacillus thuringiensis	1428	61	0.001106	71	0.00123	78	0.001439	19	0.0003545	22	0.0009213	21	0.0007963
Bacillus velezensis	492670	2	3.626e-05	4	6.929e-05	4	7.378e-05	4	7.464e-05	1	4.188e-05	1	3.792e-05
Bacteriovorax stolpii	960	3	5.438e-05	1	1.732e-05	0	0	0	0	0	0	0	0
bacterium 2013Arg42i	1561003	29	0.0005257	22	0.0003811	23	0.0004242	12	0.0002239	2	8.376e-05	5	0.0001896
Bacteroidales bacterium CF	1400053	0	0	1	1.732e-05	2	3.689e-05	0	0	1	4.188e-05	1	3.792e-05
Bacteroides coprosuis	151276	0	0	0	0	1	1.844e-05	3	5.598e-05	0	0	0	0
Bacteroides salanitronis	376805	3	5.438e-05	5	8.661e-05	19	0.0003505	3	5.598e-05	1	4.188e-05	0	0
Bacteroidetes bacterium Omega	1457365	281	0.005094	300	0.005197	990	0.01826	472	0.008807	338	0.01415	290	0.011
Barnesiella viscericola	397865	98	0.001777	53	0.0009181	212	0.00391	140	0.002612	96	0.00402	77	0.00292
Bartonella grahamii	33045	0	0	0	0	1	1.844e-05	0	0	0	0	0	0
Bartonella quintana	803	32	0.0005801	36	0.0006236	45	0.00083	49	0.0009143	24	0.001005	36	0.001365
Bdellovibrio bacteriovorus	959	22	0.0003988	20	0.0003465	32	0.0005902	28	0.0005225	22	0.0009213	32	0.001213
Bdellovibrio exovorus	453816	11	0.0001994	13	0.0002252	10	0.0001844	4	7.464e-05	3	0.0001256	0	0
Beggiatoa leptomitoformis	288004	5	9.064e-05	2	3.465e-05	3	5.533e-05	4	7.464e-05	4	0.0001675	4	0.0001517
Beijerinckia indica	533	42	0.0007614	79	0.001369	38	0.0007009	19	0.0003545	20	0.0008376	12	0.000455
Belliella baltica	232259	26	0.0004713	44	0.0007622	31	0.0005718	15	0.0002799	8	0.000335	13	0.000493
Betaproteobacteria bacterium GR16-43	1904640	19	0.0003444	18	0.0003118	0	0	0	0	0	0	1	3.792e-05
Bifidobacterium actinocoloniiforme	638619	0	0	0	0	0	0	1	1.866e-05	1	4.188e-05	0	0
Bifidobacterium longum	216816	4	7.251e-05	1	1.732e-05	2	3.689e-05	2	3.732e-05	0	0	0	0
Blastochloris viridis	1079	42	0.0007614	68	0.001178	49	0.0009038	16	0.0002986	25	0.001047	19	0.0007205
Blastococcus saxobsidens	138336	23	0.0004169	11	0.0001906	29	0.0005349	9	0.0001679	8	0.000335	6	0.0002275
Bordetella holmesii	35814	0	0	0	0	1	1.844e-05	1	1.866e-05	0	0	1	3.792e-05
Bordetella sp. HZ20	2163011	0	0	0	0	0	0	2	3.732e-05	0	0	1	3.792e-05
Borrelia miyamotoi	47466	0	0	1	1.732e-05	0	0	0	0	0	0	0	0
Bosea sp. AS-1	2015316	84	0.001523	89	0.001542	208	0.003837	150	0.002799	66	0.002764	105	0.003982
Brachyspira pilosicoli	52584	0	0	0	0	0	0	0	0	1	4.188e-05	0	0
Bradymonas sediminis	1548548	8	0.000145	3	5.197e-05	17	0.0003136	1	1.866e-05	1	4.188e-05	1	3.792e-05
Breoghania sp. L-A4	2304600	0	0	1	1.732e-05	1	1.844e-05	0	0	0	0	1	3.792e-05
Brevefilum fermentans	1986204	149	0.002701	212	0.003672	71	0.00131	124	0.002314	97	0.004062	75	0.002844
Brevibacillus brevis	1393	1	1.813e-05	0	0	2	3.689e-05	0	0	0	0	0	0
Brevibacillus laterosporus	1465	5	9.064e-05	4	6.929e-05	6	0.0001107	2	3.732e-05	3	0.0001256	0	0
Brevundimonas sp. DS20	1532555	0	0	1	1.732e-05	0	0	0	0	0	0	0	0
Brochothrix thermosphacta	2756	7	0.0001269	5	8.661e-05	3	5.533e-05	6	0.000112	5	0.0002094	7	0.0002654
Brucella abortus	235	0	0	0	0	1	1.844e-05	0	0	0	0	1	3.792e-05
Brucella melitensis	29459	1	1.813e-05	1	1.732e-05	2	3.689e-05	0	0	3	0.0001256	1	3.792e-05
Buchnera aphidicola	9	15	0.0002719	19	0.0003291	21	0.0003873	13	0.0002426	15	0.0006282	7	0.0002654
Burkholderia cenocepacia	95486	1	1.813e-05	0	0	0	0	0	0	0	0	0	0
Burkholderia diffusa	488732	0	0	0	0	1	1.844e-05	0	0	0	0	0	0
Burkholderia mallei	13373	1	1.813e-05	2	3.465e-05	0	0	0	0	2	8.376e-05	2	7.584e-05
Burkholderia pseudomallei	28450	3	5.438e-05	9	0.0001559	3	5.533e-05	5	9.33e-05	1	4.188e-05	2	7.584e-05
Burkholderia pseudomultivorans	1207504	0	0	0	0	0	0	0	0	0	0	1	3.792e-05
Burkholderiales bacterium GJ-E10	1469502	23	0.0004169	41	0.0007102	13	0.0002398	9	0.0001679	4	0.0001675	14	0.0005309
Burkholderiales bacterium JOSHI_001	864051	0	0	1	1.732e-05	0	0	0	0	0	0	1	3.792e-05
Burkholderiales bacterium YL45	1834205	0	0	0	0	1	1.844e-05	0	0	0	0	0	0
Butyrivibrio fibrisolvens	831	0	0	1	1.732e-05	1	1.844e-05	0	0	3	0.0001256	0	0
Caldanaerobacter subterraneus	911092	13	0.0002357	15	0.0002598	48	0.0008853	4	7.464e-05	4	0.0001675	2	7.584e-05
Caldicellulosiruptor saccharolyticus	44001	5	9.064e-05	14	0.0002425	14	0.0002582	12	0.0002239	5	0.0002094	6	0.0002275
Caldilinea aerophila	133453	48	0.0008701	48	0.0008315	56	0.001033	28	0.0005225	20	0.0008376	17	0.0006446
Caldisericum exile	693075	1	1.813e-05	0	0	0	0	0	0	0	0	0	0
Calditerrivibrio nitroreducens	477976	9	0.0001632	78	0.001351	5	9.222e-05	5	9.33e-05	0	0	2	7.584e-05
Caldithrix abyssi	187145	2	3.626e-05	0	0	0	0	0	0	0	0	1	3.792e-05
Calothrix parietina	32054	0	0	3	5.197e-05	0	0	1	1.866e-05	0	0	0	0
Calothrix sp. NIES-4101	2005461	0	0	1	1.732e-05	0	0	0	0	0	0	0	0
Calothrix sp. PCC 7507	99598	0	0	1	1.732e-05	1	1.844e-05	0	0	0	0	0	0
Calyptogena okutanii thioautotrophic gill symbiont	410330	1	1.813e-05	0	0	0	0	0	0	0	0	0	0
Campylobacter hepaticus	1813019	0	0	0	0	1	1.844e-05	0	0	0	0	0	0
Candidatus Accumulibacter phosphatis	327160	74	0.001341	146	0.002529	68	0.001254	34	0.0006344	22	0.0009213	28	0.001062
Candidatus Amoebophilus asiaticus	281120	8	0.000145	8	0.0001386	2	3.689e-05	2	3.732e-05	2	8.376e-05	5	0.0001896
Candidatus Arsenophonus lipoptenae	634113	37	0.0006707	85	0.001472	25	0.0004611	5	9.33e-05	4	0.0001675	7	0.0002654
Candidatus Atelocyanobacterium thalassa	713887	1	1.813e-05	0	0	0	0	0	0	0	0	0	0
Candidatus Azobacteroides pseudotrichonymphae	511435	0	0	0	0	0	0	0	0	0	0	1	3.792e-05
Candidatus Babela massiliensis	673862	6	0.0001088	9	0.0001559	2	3.689e-05	3	5.598e-05	3	0.0001256	3	0.0001138
Candidatus Baumannia cicadellinicola	186490	11	0.0001994	16	0.0002772	17	0.0003136	35	0.0006531	17	0.0007119	46	0.001744
Candidatus Blochmannia floridanus	203907	0	0	2	3.465e-05	0	0	1	1.866e-05	3	0.0001256	1	3.792e-05
Candidatus Dependentiae bacterium (ex Spumella elongata CCAP 955/1)	2066483	51	0.0009245	95	0.001646	82	0.001512	48	0.0008957	16	0.00067	14	0.0005309
Candidatus Desulfofervidus auxilii	1621989	1	1.813e-05	3	5.197e-05	1	1.844e-05	0	0	0	0	2	7.584e-05
Candidatus Desulforudis audaxviator	471827	40	0.0007251	83	0.001438	74	0.001365	49	0.0009143	21	0.0008794	22	0.0008342
Candidatus Endolissoclinum faulkneri	1263979	0	0	0	0	0	0	0	0	0	0	1	3.792e-05
Candidatus Erwinia sp. ErCipseudotaxifoliae	1922217	4	7.251e-05	14	0.0002425	6	0.0001107	4	7.464e-05	1	4.188e-05	6	0.0002275
Candidatus Evansia muelleri	1495769	0	0	0	0	0	0	1	1.866e-05	0	0	0	0
Candidatus Filomicrobium marinum	1608628	10	0.0001813	11	0.0001906	11	0.0002029	18	0.0003359	8	0.000335	10	0.0003792
Candidatus Fonsibacter ubiquis	1925548	49	0.0008883	37	0.0006409	13	0.0002398	3	5.598e-05	1	4.188e-05	8	0.0003034
Candidatus Fukatsuia symbiotica	1878942	1	1.813e-05	5	8.661e-05	7	0.0001291	4	7.464e-05	5	0.0002094	1	3.792e-05
Candidatus Gullanella endobia	1070130	8	0.000145	10	0.0001732	11	0.0002029	17	0.0003172	12	0.0005025	12	0.000455
Candidatus Ishikawaella capsulata	168169	5	9.064e-05	2	3.465e-05	15	0.0002767	1	1.866e-05	1	4.188e-05	0	0
Candidatus Izimaplasma sp. HR1	1541959	3	5.438e-05	0	0	0	0	0	0	0	0	0	0
Candidatus Kinetoplastibacterium sorsogonicusi	1576550	0	0	1	1.732e-05	0	0	0	0	0	0	0	0
Candidatus Koribacter versatilis	658062	180	0.003263	400	0.006929	248	0.004574	66	0.001232	52	0.002178	51	0.001934
Candidatus Kuenenia stuttgartiensis	174633	86	0.001559	160	0.002772	48	0.0008853	14	0.0002612	15	0.0006282	20	0.0007584
Candidatus Liberibacter americanus	309868	3	5.438e-05	6	0.0001039	2	3.689e-05	11	0.0002053	10	0.0004188	2	7.584e-05
Candidatus Liberibacter asiaticus	34021	2	3.626e-05	2	3.465e-05	2	3.689e-05	0	0	0	0	1	3.792e-05
Candidatus Methanomassiliicoccus intestinalis	1406512	2	3.626e-05	6	0.0001039	1	1.844e-05	0	0	0	0	4	0.0001517
Candidatus Methylopumilus planktonicus	1581557	0	0	1	1.732e-05	0	0	0	0	0	0	0	0
Candidatus Methylopumilus turicensis	1581680	2	3.626e-05	1	1.732e-05	0	0	1	1.866e-05	1	4.188e-05	5	0.0001896
Candidatus Midichloria mitochondrii	234827	5	9.064e-05	4	6.929e-05	6	0.0001107	12	0.0002239	5	0.0002094	1	3.792e-05
Candidatus Mikella endobia	1778264	1	1.813e-05	0	0	0	0	0	0	0	0	0	0
Candidatus Moranella endobia	1048758	22	0.0003988	26	0.0004504	10	0.0001844	12	0.0002239	11	0.0004607	10	0.0003792
Candidatus Nitrosocaldus islandicus	2045011	1	1.813e-05	0	0	1	1.844e-05	1	1.866e-05	0	0	0	0
Candidatus Nitrosopumilus adriaticus	1580092	3	5.438e-05	9	0.0001559	3	5.533e-05	10	0.0001866	4	0.0001675	5	0.0001896
Candidatus Nitrosotenuis aquarius	1846278	83	0.001505	141	0.002443	87	0.001605	105	0.001959	73	0.003057	95	0.003602
Candidatus Nitrosotenuis cloacae	1603555	61	0.001106	144	0.002494	48	0.0008853	59	0.001101	77	0.003225	57	0.002161
Candidatus Nucleicultrix amoebiphila	1509244	55	0.000997	68	0.001178	33	0.0006087	30	0.0005598	12	0.0005025	18	0.0006826
Candidatus Pantoea carbekii	1235990	1	1.813e-05	0	0	0	0	0	0	0	0	0	0
Candidatus Paracaedibacter acanthamoebae	91604	49	0.0008883	19	0.0003291	14	0.0002582	7	0.0001306	3	0.0001256	1	3.792e-05
Candidatus Pelagibacter sp. IMCC9063	1002672	14	0.0002538	32	0.0005543	10	0.0001844	3	5.598e-05	4	0.0001675	7	0.0002654
Candidatus Pelagibacter sp. RS40	1977865	110	0.001994	91	0.001576	114	0.002103	247	0.004609	83	0.003476	83	0.003147
Candidatus Phaeomarinobacter ectocarpi	1458461	1	1.813e-05	3	5.197e-05	2	3.689e-05	2	3.732e-05	3	0.0001256	4	0.0001517
Candidatus Phycorickettsia trachydisci	2115978	2	3.626e-05	3	5.197e-05	2	3.689e-05	4	7.464e-05	2	8.376e-05	1	3.792e-05
Candidatus Phytoplasma mali	37692	0	0	1	1.732e-05	0	0	0	0	1	4.188e-05	0	0
Candidatus Portiera aleyrodidarum	91844	5	9.064e-05	0	0	1	1.844e-05	1	1.866e-05	2	8.376e-05	12	0.000455
Candidatus Profftella armatura	669502	2	3.626e-05	1	1.732e-05	4	7.378e-05	3	5.598e-05	1	4.188e-05	4	0.0001517
Candidatus Promineofilum breve	1806508	26	0.0004713	32	0.0005543	46	0.0008485	59	0.001101	31	0.001298	19	0.0007205
Candidatus Protochlamydia amoebophila	362787	9	0.0001632	8	0.0001386	15	0.0002767	0	0	2	8.376e-05	1	3.792e-05
Candidatus Protochlamydia naegleriophila	389348	5	9.064e-05	9	0.0001559	1	1.844e-05	0	0	0	0	0	0
Candidatus Puniceispirillum marinum	767892	231	0.004188	546	0.009458	213	0.003929	233	0.004348	124	0.005193	154	0.00584
Candidatus Purcelliella pentastirinorum	472834	29	0.0005257	11	0.0001906	8	0.0001476	6	0.000112	3	0.0001256	7	0.0002654
Candidatus Rhodoluna planktonica	535712	6	0.0001088	1	1.732e-05	4	7.378e-05	2	3.732e-05	0	0	4	0.0001517
Candidatus Riesia pediculischaeffi	428411	2	3.626e-05	0	0	0	0	0	0	0	0	0	0
Candidatus Saccharibacteria bacterium YM_S32_TM7_50_20	2056494	0	0	5	8.661e-05	4	7.378e-05	2	3.732e-05	2	8.376e-05	0	0
Candidatus Saccharibacteria oral taxon TM7x	1476577	1	1.813e-05	2	3.465e-05	2	3.689e-05	0	0	1	4.188e-05	0	0
Candidatus Sodalis pierantonius	1486991	4	7.251e-05	1	1.732e-05	1	1.844e-05	2	3.732e-05	3	0.0001256	3	0.0001138
Candidatus Solibacter usitatus	332163	90	0.001632	123	0.002131	50	0.0009222	22	0.0004105	29	0.001214	33	0.001251
Candidatus Sulcia muelleri	336810	6	0.0001088	21	0.0003638	20	0.0003689	9	0.0001679	3	0.0001256	3	0.0001138
Candidatus Symbiobacter mobilis	1436290	5	9.064e-05	32	0.0005543	17	0.0003136	2	3.732e-05	1	4.188e-05	20	0.0007584
Candidatus Tachikawaea gelatinosa	1410383	14	0.0002538	22	0.0003811	14	0.0002582	15	0.0002799	8	0.000335	10	0.0003792
Capnocytophaga gingivalis	1017	9	0.0001632	5	8.661e-05	3	5.533e-05	2	3.732e-05	3	0.0001256	2	7.584e-05
Carboxydocella thermautotrophica	178899	17	0.0003082	15	0.0002598	25	0.0004611	25	0.0004665	18	0.0007538	16	0.0006067
Carboxydothermus hydrogenoformans	129958	11	0.0001994	2	3.465e-05	41	0.0007562	10	0.0001866	12	0.0005025	6	0.0002275
Castellaniella defragrans	75697	0	0	0	0	0	0	1	1.866e-05	0	0	1	3.792e-05
Catenulispora acidiphila	304895	0	0	0	0	1	1.844e-05	0	0	0	0	0	0
Caulobacter mirabilis	69666	32	0.0005801	21	0.0003638	36	0.000664	238	0.004441	37	0.001549	47	0.001782
Caulobacteraceae bacterium OTSz_A_272	1759059	220	0.003988	353	0.006115	146	0.002693	116	0.002165	63	0.002638	105	0.003982
Celeribacter baekdonensis	875171	0	0	2	3.465e-05	2	3.689e-05	0	0	1	4.188e-05	1	3.792e-05
Celeribacter marinus	1397108	3	5.438e-05	1	1.732e-05	5	9.222e-05	5	9.33e-05	1	4.188e-05	3	0.0001138
Cellulomonas gilvus	11	0	0	0	0	2	3.689e-05	5	9.33e-05	1	4.188e-05	1	3.792e-05
Cellulomonas sp. PSBB021	2003551	35	0.0006345	8	0.0001386	8	0.0001476	10	0.0001866	2	8.376e-05	8	0.0003034
Cellulosilyticum lentocellum	29360	2	3.626e-05	6	0.0001039	5	9.222e-05	1	1.866e-05	1	4.188e-05	0	0
Cellvibrio sp. PSBB023	1945512	0	0	2	3.465e-05	0	0	0	0	0	0	2	7.584e-05
Chelativorans sp. BNC1	266779	59	0.00107	7	0.0001213	12	0.0002213	19	0.0003545	17	0.0007119	27	0.001024
Chitinophaga caeni	2029983	1	1.813e-05	0	0	0	0	16	0.0002986	0	0	0	0
Chitinophaga pinensis	79329	0	0	11	0.0001906	1	1.844e-05	2	3.732e-05	0	0	0	0
Chitinophaga sp. MD30	2033437	25	0.0004532	9	0.0001559	14	0.0002582	268	0.005001	51	0.002136	38	0.001441
Chlamydia abortus	83555	7	0.0001269	3	5.197e-05	13	0.0002398	7	0.0001306	1	4.188e-05	3	0.0001138
Chlamydia felis	83556	0	0	4	6.929e-05	1	1.844e-05	2	3.732e-05	0	0	0	0
Chlamydia gallinacea	1457153	0	0	0	0	1	1.844e-05	0	0	0	0	0	0
Chlamydia suis	83559	0	0	1	1.732e-05	0	0	0	0	0	0	0	0
Chloracidobacterium thermophilum	458033	967	0.01753	1505	0.02607	287	0.005294	182	0.003396	126	0.005277	259	0.009821
Chlorobium phaeobacteroides	1096	5	9.064e-05	1	1.732e-05	3	5.533e-05	2	3.732e-05	0	0	0	0
Chloroflexus aggregans	152260	2	3.626e-05	5	8.661e-05	6	0.0001107	4	7.464e-05	1	4.188e-05	2	7.584e-05
Chloroflexus aurantiacus	1108	126	0.002284	176	0.003049	316	0.005829	211	0.003937	132	0.005528	108	0.004095
Chloroherpeton thalassium	100716	7	0.0001269	7	0.0001213	3	5.533e-05	5	9.33e-05	4	0.0001675	4	0.0001517
Chondrocystis sp. NIES-4102	2005460	0	0	1	1.732e-05	2	3.689e-05	0	0	0	0	1	3.792e-05
Chondromyces crocatus	52	328	0.005946	610	0.01057	324	0.005976	193	0.003601	128	0.00536	140	0.005309
Chromatiaceae bacterium 2141T.STBD.0c.01a	1978339	0	0	0	0	0	0	19	0.0003545	2	8.376e-05	0	0
Chryseobacterium gallinarum	1324352	2	3.626e-05	0	0	0	0	0	0	0	0	0	0
Chryseobacterium indologenes	253	0	0	0	0	0	0	1	1.866e-05	0	0	0	0
Chryseobacterium sp. IHB B 17019	1721091	0	0	0	0	0	0	0	0	0	0	1	3.792e-05
Chryseobacterium taklimakanense	536441	7	0.0001269	1	1.732e-05	1	1.844e-05	8	0.0001493	2	8.376e-05	0	0
Chryseolinea sp. KIS68-18	2321403	551	0.009989	424	0.007345	336	0.006197	387	0.007221	298	0.01248	309	0.01172
Chthonomonas calidirosea	454171	2	3.626e-05	3	5.197e-05	1	1.844e-05	0	0	1	4.188e-05	0	0
Cloacibacillus porcorum	1197717	0	0	0	0	1	1.844e-05	0	0	0	0	1	3.792e-05
Clostridioides difficile	1496	1	1.813e-05	2	3.465e-05	0	0	1	1.866e-05	0	0	1	3.792e-05
Clostridium acetobutylicum	1488	3	5.438e-05	3	5.197e-05	5	9.222e-05	3	5.598e-05	1	4.188e-05	2	7.584e-05
Clostridium argentinense	29341	0	0	0	0	2	3.689e-05	0	0	2	8.376e-05	0	0
Clostridium baratii	1561	7	0.0001269	15	0.0002598	49	0.0009038	14	0.0002612	5	0.0002094	9	0.0003413
Clostridium bornimense	1216932	1	1.813e-05	0	0	1	1.844e-05	0	0	0	0	0	0
Clostridium botulinum	1491	0	0	0	0	1	1.844e-05	0	0	2	8.376e-05	2	7.584e-05
Clostridium butyricum	1492	1	1.813e-05	4	6.929e-05	6	0.0001107	3	5.598e-05	2	8.376e-05	2	7.584e-05
Clostridium cellulovorans	1493	2	3.626e-05	2	3.465e-05	1	1.844e-05	0	0	0	0	0	0
Clostridium drakei	332101	1	1.813e-05	0	0	0	0	0	0	0	0	0	0
Clostridium estertheticum	238834	15	0.0002719	13	0.0002252	27	0.000498	12	0.0002239	9	0.0003769	9	0.0003413
Clostridium novyi	1542	0	0	1	1.732e-05	1	1.844e-05	0	0	1	4.188e-05	0	0
Clostridium pasteurianum	1501	0	0	1	1.732e-05	0	0	3	5.598e-05	1	4.188e-05	0	0
Clostridium perfringens	1502	1	1.813e-05	3	5.197e-05	3	5.533e-05	3	5.598e-05	1	4.188e-05	2	7.584e-05
Clostridium sp. BNL1100	755731	23	0.0004169	47	0.0008142	62	0.001144	13	0.0002426	3	0.0001256	2	7.584e-05
Clostridium sp. JN500901	2068654	3	5.438e-05	1	1.732e-05	1	1.844e-05	0	0	3	0.0001256	2	7.584e-05
Clostridium sp. MF28	1702238	0	0	2	3.465e-05	2	3.689e-05	3	5.598e-05	0	0	1	3.792e-05
Clostridium taeniosporum	394958	0	0	0	0	0	0	1	1.866e-05	0	0	0	0
Clostridium tyrobutyricum	1519	7	0.0001269	5	8.661e-05	15	0.0002767	1	1.866e-05	1	4.188e-05	3	0.0001138
Collimonas fungivorans	158899	40	0.0007251	71	0.00123	28	0.0005165	1	1.866e-05	0	0	0	0
Colwellia sp. MT41	58049	0	0	3	5.197e-05	2	3.689e-05	0	0	0	0	0	0
Comamonas serinivorans	1082851	1	1.813e-05	0	0	0	0	0	0	0	0	0	0
Comamonas testosteroni	285	0	0	0	0	0	0	1	1.866e-05	0	0	0	0
Conexibacter woesei	191495	550	0.00997	784	0.01358	861	0.01588	513	0.009573	324	0.01357	310	0.01176
Confluentimicrobium sp. EMB200-NS6	1609966	0	0	0	0	0	0	3	5.598e-05	0	0	0	0
Congregibacter litoralis	393662	10	0.0001813	7	0.0001213	3	5.533e-05	2	3.732e-05	3	0.0001256	5	0.0001896
Coprothermobacter proteolyticus	35786	36	0.0006526	33	0.0005717	23	0.0004242	19	0.0003545	15	0.0006282	25	0.000948
Coraliomargarita akajimensis	395922	7	0.0001269	0	0	1	1.844e-05	1	1.866e-05	0	0	1	3.792e-05
Corynebacterium aurimucosum	169292	191	0.003462	226	0.003915	376	0.006935	193	0.003601	141	0.005905	118	0.004475
Corynebacterium genitalium	38288	7	0.0001269	0	0	1	1.844e-05	35	0.0006531	0	0	1	3.792e-05
Corynebacterium jeikeium	38289	0	0	0	0	0	0	1	1.866e-05	0	0	0	0
Corynebacterium kroppenstedtii	161879	4	7.251e-05	1	1.732e-05	2	3.689e-05	0	0	3	0.0001256	0	0
Corynebacterium maris	575200	1	1.813e-05	0	0	0	0	0	0	0	0	0	0
Corynebacterium mustelae	571915	0	0	0	0	0	0	0	0	1	4.188e-05	0	0
Corynebacterium provencense	1737425	0	0	1	1.732e-05	0	0	0	0	0	0	0	0
Corynebacterium pseudotuberculosis	1719	5	9.064e-05	2	3.465e-05	2	3.689e-05	3	5.598e-05	1	4.188e-05	2	7.584e-05
Corynebacterium timonense	441500	0	0	0	0	1	1.844e-05	0	0	0	0	0	0
Coxiella burnetii	777	8	0.000145	12	0.0002079	12	0.0002213	13	0.0002426	29	0.001214	14	0.0005309
Croceibacter atlanticus	313588	4	7.251e-05	12	0.0002079	14	0.0002582	3	5.598e-05	4	0.0001675	2	7.584e-05
Croceicoccus marinus	450378	0	0	2	3.465e-05	5	9.222e-05	4	7.464e-05	3	0.0001256	0	0
Croceicoccus naphthovorans	1348774	0	0	0	0	1	1.844e-05	0	0	0	0	0	0
Cryptobacterium curtum	84163	4	7.251e-05	3	5.197e-05	5	9.222e-05	3	5.598e-05	3	0.0001256	3	0.0001138
Cupriavidus metallidurans	119219	40	0.0007251	70	0.001213	6	0.0001107	28	0.0005225	5	0.0002094	25	0.000948
Cupriavidus necator	106590	1	1.813e-05	0	0	0	0	1	1.866e-05	1	4.188e-05	0	0
Cupriavidus taiwanensis	164546	0	0	0	0	0	0	1	1.866e-05	0	0	0	0
Cyanothece sp. PCC 7425	395961	0	0	1	1.732e-05	0	0	0	0	0	0	0	0
Cystobacter fuscus	43	2	3.626e-05	4	6.929e-05	2	3.689e-05	1	1.866e-05	1	4.188e-05	4	0.0001517
Cytophaga hutchinsonii	985	12	0.0002175	9	0.0001559	5	9.222e-05	10	0.0001866	10	0.0004188	4	0.0001517
Cytophagales bacterium TFI 002	1945892	3	5.438e-05	4	6.929e-05	3	5.533e-05	2	3.732e-05	0	0	10	0.0003792
Deferribacter desulfuricans	197162	0	0	0	0	1	1.844e-05	1	1.866e-05	0	0	0	0
Defluviimonas alba	1335048	0	0	0	0	0	0	1	1.866e-05	1	4.188e-05	0	0
Dehalobacter restrictus	55583	47	0.000852	65	0.001126	42	0.0007747	10	0.0001866	5	0.0002094	10	0.0003792
Dehalobacterium formicoaceticum	51515	3	5.438e-05	4	6.929e-05	0	0	1	1.866e-05	1	4.188e-05	0	0
Dehalogenimonas formicexedens	1839801	0	0	0	0	0	0	1	1.866e-05	0	0	0	0
Deinococcus deserti	310783	29	0.0005257	39	0.0006756	10	0.0001844	11	0.0002053	16	0.00067	11	0.0004171
Deinococcus ficus	317577	8	0.000145	0	0	0	0	8	0.0001493	2	8.376e-05	1	3.792e-05
Deinococcus geothermalis	68909	0	0	0	0	1	1.844e-05	0	0	0	0	0	0
Deinococcus gobiensis	502394	0	0	1	1.732e-05	0	0	0	0	0	0	0	0
Deinococcus maricopensis	309887	74	0.001341	60	0.001039	131	0.002416	63	0.001176	44	0.001843	75	0.002844
Deinococcus peraridilitoris	432329	16	0.00029	14	0.0002425	11	0.0002029	5	9.33e-05	4	0.0001675	6	0.0002275
Deinococcus proteolyticus	55148	1	1.813e-05	3	5.197e-05	1	1.844e-05	1	1.866e-05	0	0	0	0
Deinococcus puniceus	1182568	30	0.0005438	44	0.0007622	8	0.0001476	9	0.0001679	1	4.188e-05	14	0.0005309
Deinococcus sp. NW-56	2080419	0	0	0	0	0	0	0	0	0	0	2	7.584e-05
Deinococcus wulumuqiensis	980427	4	7.251e-05	4	6.929e-05	2	3.689e-05	1	1.866e-05	0	0	1	3.792e-05
Denitrobacterium detoxificans	79604	1	1.813e-05	6	0.0001039	2	3.689e-05	3	5.598e-05	1	4.188e-05	1	3.792e-05
Dermabacter vaginalis	1630135	0	0	0	0	1	1.844e-05	3	5.598e-05	0	0	1	3.792e-05
Dermatophilus congolensis	1863	11	0.0001994	0	0	7	0.0001291	0	0	9	0.0003769	3	0.0001138
Desulfallas gibsoniae	102134	66	0.001196	153	0.00265	24	0.0004427	15	0.0002799	3	0.0001256	22	0.0008342
Desulfarculus baarsii	453230	1	1.813e-05	2	3.465e-05	0	0	1	1.866e-05	0	0	2	7.584e-05
Desulfatibacillum alkenivorans	259354	184	0.003336	310	0.00537	76	0.001402	65	0.001213	52	0.002178	49	0.001858
Desulfitobacterium hafniense	49338	0	0	0	0	1	1.844e-05	0	0	0	0	0	0
Desulfitobacterium metallireducens	142877	5	9.064e-05	9	0.0001559	13	0.0002398	10	0.0001866	2	8.376e-05	1	3.792e-05
Desulfobacca acetoxidans	60893	31	0.000562	55	0.0009528	10	0.0001844	5	9.33e-05	2	8.376e-05	9	0.0003413
Desulfobacter postgatei	2293	8	0.000145	19	0.0003291	34	0.0006271	23	0.0004292	25	0.001047	17	0.0006446
Desulfobacterium autotrophicum	2296	1	1.813e-05	1	1.732e-05	0	0	0	0	0	0	0	0
Desulfobacula toluolica	28223	1	1.813e-05	1	1.732e-05	0	0	1	1.866e-05	0	0	0	0
Desulfocapsa sulfexigens	65555	82	0.001487	154	0.002668	94	0.001734	52	0.0009703	58	0.002429	39	0.001479
Desulfococcus multivorans	897	14	0.0002538	52	0.0009008	8	0.0001476	16	0.0002986	20	0.0008376	14	0.0005309
Desulfococcus oleovorans	181663	2	3.626e-05	0	0	1	1.844e-05	0	0	1	4.188e-05	0	0
Desulfofarcimen acetoxidans	58138	9	0.0001632	11	0.0001906	5	9.222e-05	4	7.464e-05	5	0.0002094	1	3.792e-05
Desulfohalobium retbaense	45663	1	1.813e-05	4	6.929e-05	3	5.533e-05	5	9.33e-05	2	8.376e-05	5	0.0001896
Desulfomicrobium baculatum	899	0	0	0	0	0	0	0	0	0	0	1	3.792e-05
Desulfomonile tiedjei	2358	34	0.0006164	86	0.00149	32	0.0005902	27	0.0005038	12	0.0005025	26	0.0009859
Desulfosporosinus acidiphilus	885581	1	1.813e-05	0	0	0	0	0	0	0	0	0	0
Desulfosporosinus youngiae	339862	0	0	0	0	1	1.844e-05	0	0	0	0	0	0
Desulfotalea psychrophila	84980	7	0.0001269	4	6.929e-05	29	0.0005349	2	3.732e-05	2	8.376e-05	1	3.792e-05
Desulfotomaculum ferrireducens	1833852	59	0.00107	91	0.001576	106	0.001955	216	0.004031	133	0.00557	114	0.004323
Desulfotomaculum nigrificans	1565	0	0	1	1.732e-05	1	1.844e-05	2	3.732e-05	2	8.376e-05	0	0
Desulfotomaculum reducens	59610	0	0	1	1.732e-05	0	0	0	0	0	0	0	0
Desulfovibrio africanus	873	14	0.0002538	13	0.0002252	26	0.0004796	18	0.0003359	32	0.00134	18	0.0006826
Desulfovibrio alaskensis	58180	0	0	1	1.732e-05	0	0	2	3.732e-05	1	4.188e-05	0	0
Desulfovibrio gigas	879	0	0	2	3.465e-05	1	1.844e-05	0	0	0	0	1	3.792e-05
Desulfovibrio hydrothermalis	191026	1	1.813e-05	3	5.197e-05	1	1.844e-05	0	0	1	4.188e-05	0	0
Desulfovibrio salexigens	880	0	0	1	1.732e-05	0	0	1	1.866e-05	0	0	1	3.792e-05
Desulfovibrio sp. FW1012B	644968	2	3.626e-05	5	8.661e-05	0	0	4	7.464e-05	4	0.0001675	6	0.0002275
Desulfovibrio vulgaris	881	6	0.0001088	34	0.000589	26	0.0004796	9	0.0001679	15	0.0006282	7	0.0002654
Desulfurella acetivorans	33002	2	3.626e-05	10	0.0001732	1	1.844e-05	1	1.866e-05	1	4.188e-05	1	3.792e-05
Desulfurispirillum indicum	936456	7	0.0001269	20	0.0003465	9	0.000166	4	7.464e-05	2	8.376e-05	8	0.0003034
Desulfurivibrio alkaliphilus	427923	8	0.000145	12	0.0002079	1	1.844e-05	2	3.732e-05	1	4.188e-05	5	0.0001896
Desulfurobacterium thermolithotrophum	64160	1	1.813e-05	1	1.732e-05	0	0	3	5.598e-05	0	0	0	0
Desulfuromonas soudanensis	1603606	1	1.813e-05	3	5.197e-05	0	0	0	0	0	0	0	0
Desulfuromonas sp. DDH964	1823759	0	0	0	0	0	0	1	1.866e-05	0	0	0	0
Devosia sp. A16	1736675	142	0.002574	90	0.001559	171	0.003154	201	0.003751	120	0.005025	84	0.003185
Devosia sp. H5989	1643450	35	0.0006345	20	0.0003465	55	0.001014	36	0.0006718	83	0.003476	22	0.0008342
Devosia sp. I507	2083786	2	3.626e-05	1	1.732e-05	7	0.0001291	5	9.33e-05	5	0.0002094	7	0.0002654
Devriesea agamarum	472569	0	0	0	0	0	0	0	0	1	4.188e-05	0	0
Dichelobacter nodosus	870	22	0.0003988	33	0.0005717	44	0.0008116	11	0.0002053	2	8.376e-05	26	0.0009859
Dictyoglomus turgidum	513050	162	0.002937	223	0.003863	238	0.00439	87	0.001623	115	0.004816	102	0.003868
Dokdonella koreensis	323415	154	0.002792	276	0.004781	57	0.001051	39	0.0007277	16	0.00067	74	0.002806
Draconibacterium orientale	1168034	61	0.001106	37	0.0006409	38	0.0007009	25	0.0004665	18	0.0007538	16	0.0006067
Dyadobacter fermentans	94254	0	0	0	0	0	0	0	0	0	0	1	3.792e-05
Dyella japonica	231455	2	3.626e-05	6	0.0001039	2	3.689e-05	3	5.598e-05	0	0	0	0
Dyella jiangningensis	1379159	0	0	0	0	0	0	2	3.732e-05	0	0	0	0
Dyella thiooxydans	445710	2	3.626e-05	5	8.661e-05	2	3.689e-05	23	0.0004292	17	0.0007119	0	0
Ectothiorhodospira sp. BSL-9	1442136	0	0	2	3.465e-05	0	0	0	0	1	4.188e-05	0	0
Eggerthella lenta	84112	2	3.626e-05	0	0	5	9.222e-05	1	1.866e-05	0	0	2	7.584e-05
Ehrlichia ruminantium	779	7	0.0001269	13	0.0002252	12	0.0002213	0	0	3	0.0001256	7	0.0002654
Eikenella corrodens	539	8	0.000145	0	0	1	1.844e-05	0	0	0	0	0	0
Elusimicrobium minutum	423605	14	0.0002538	36	0.0006236	10	0.0001844	3	5.598e-05	3	0.0001256	4	0.0001517
endosymbiont of Acanthamoeba sp. UWC8	86106	2	3.626e-05	3	5.197e-05	2	3.689e-05	1	1.866e-05	1	4.188e-05	1	3.792e-05
endosymbiont of unidentified scaly snail isolate Monju	1248727	34	0.0006164	5	8.661e-05	64	0.00118	27	0.0005038	20	0.0008376	15	0.0005688
Ensifer adhaerens	106592	3	5.438e-05	3	5.197e-05	1	1.844e-05	0	0	1	4.188e-05	0	0
Enterobacter cloacae	550	2	3.626e-05	6	0.0001039	4	7.378e-05	6	0.000112	2	8.376e-05	1	3.792e-05
Enterobacter cloacae complex sp. FDA-CDC-AR_0164	2077136	0	0	0	0	0	0	2	3.732e-05	0	0	0	0
Enterobacteriaceae bacterium strain FGI 57	693444	1	1.813e-05	0	0	0	0	0	0	1	4.188e-05	0	0
Enterococcus cecorum	44008	3	5.438e-05	5	8.661e-05	1	1.844e-05	0	0	1	4.188e-05	0	0
Enterococcus durans	53345	0	0	0	0	1	1.844e-05	0	0	1	4.188e-05	1	3.792e-05
Enterococcus faecium	1352	0	0	0	0	0	0	0	0	0	0	1	3.792e-05
Entomoplasma somnilux	215578	0	0	1	1.732e-05	2	3.689e-05	0	0	0	0	0	0
Ereboglobus luteus	1796921	1	1.813e-05	1	1.732e-05	0	0	0	0	0	0	0	0
Erwinia billingiae	182337	2	3.626e-05	2	3.465e-05	1	1.844e-05	1	1.866e-05	0	0	0	0
Erysipelothrix larvae	1514105	17	0.0003082	30	0.0005197	14	0.0002582	12	0.0002239	14	0.0005863	12	0.000455
Erythrobacter atlanticus	1648404	1	1.813e-05	0	0	1	1.844e-05	0	0	1	4.188e-05	0	0
Erythrobacter gangjinensis	502682	33	0.0005982	65	0.001126	20	0.0003689	8	0.0001493	6	0.0002513	3	0.0001138
Erythrobacter seohaensis	266951	1	1.813e-05	1	1.732e-05	0	0	1	1.866e-05	0	0	0	0
Erythrobacter sp. Alg231-14	1922225	0	0	2	3.465e-05	0	0	1	1.866e-05	1	4.188e-05	0	0
Erythrobacter sp. HL-111	1798193	2	3.626e-05	0	0	1	1.844e-05	52	0.0009703	37	0.001549	2	7.584e-05
Escherichia albertii	208962	0	0	0	0	0	0	0	0	0	0	2	7.584e-05
Escherichia coli	562	16	0.00029	12	0.0002079	10	0.0001844	13	0.0002426	18	0.0007538	8	0.0003034
Ethanoligenens harbinense	253239	12	0.0002175	10	0.0001732	8	0.0001476	1	1.866e-05	1	4.188e-05	0	0
Euzebya sp. DY32-46	1608957	2	3.626e-05	8	0.0001386	3	5.533e-05	7	0.0001306	9	0.0003769	6	0.0002275
Exiguobacterium sp. AT1b	360911	1	1.813e-05	1	1.732e-05	1	1.844e-05	2	3.732e-05	1	4.188e-05	0	0
Faecalibacterium prausnitzii	853	7	0.0001269	16	0.0002772	16	0.0002951	15	0.0002799	0	0	2	7.584e-05
Fastidiosipila sanguinis	236753	6	0.0001088	1	1.732e-05	3	5.533e-05	2	3.732e-05	1	4.188e-05	1	3.792e-05
Ferriphaselus amnicola	1188319	0	0	0	0	0	0	0	0	1	4.188e-05	0	0
Fervidobacterium nodosum	2424	1	1.813e-05	0	0	0	0	0	0	0	0	0	0
Fibrobacter succinogenes	833	10	0.0001813	17	0.0002945	10	0.0001844	12	0.0002239	29	0.001214	17	0.0006446
Filifactor alocis	143361	0	0	6	0.0001039	1	1.844e-05	0	0	2	8.376e-05	0	0
Filimonas lacunae	477680	11	0.0001994	20	0.0003465	8	0.0001476	53	0.000989	20	0.0008376	5	0.0001896
Fimbriimonas ginsengisoli	1005039	6	0.0001088	3	5.197e-05	11	0.0002029	5	9.33e-05	4	0.0001675	6	0.0002275
Finegoldia magna	1260	0	0	0	0	0	0	1	1.866e-05	0	0	0	0
Fischerella sp. NIES-4106	2005456	0	0	1	1.732e-05	2	3.689e-05	1	1.866e-05	1	4.188e-05	0	0
Flagellimonas sp. HME9304	1383885	0	0	0	0	1	1.844e-05	0	0	0	0	0	0
Flammeovirga sp. MY04	1191459	1	1.813e-05	1	1.732e-05	1	1.844e-05	0	0	0	0	1	3.792e-05
Flammeovirgaceae bacterium 311	1257021	0	0	2	3.465e-05	0	0	0	0	0	0	0	0
Flavisolibacter tropicus	1492898	19	0.0003444	14	0.0002425	4	7.378e-05	19	0.0003545	5	0.0002094	12	0.000455
Flavobacteriaceae bacterium MAR_2010_188	1250295	0	0	0	0	1	1.844e-05	0	0	0	0	1	3.792e-05
Flavobacteriaceae bacterium UJ101	1150389	3	5.438e-05	1	1.732e-05	1	1.844e-05	0	0	0	0	0	0
Flavobacterium arcticum	1784713	0	0	3	5.197e-05	6	0.0001107	0	0	0	0	0	0
Flavobacterium branchiophilum	55197	0	0	1	1.732e-05	0	0	0	0	0	0	0	0
Flavobacterium columnare	996	3	5.438e-05	5	8.661e-05	1	1.844e-05	0	0	0	0	1	3.792e-05
Flavobacterium commune	1306519	28	0.0005076	5	8.661e-05	0	0	0	0	0	0	0	0
Flavobacterium crassostreae	1763534	2	3.626e-05	0	0	0	0	0	0	0	0	0	0
Flavobacterium gilvum	1492737	18	0.0003263	6	0.0001039	2	3.689e-05	2	3.732e-05	0	0	1	3.792e-05
Flavobacterium johnsoniae	986	6	0.0001088	0	0	2	3.689e-05	0	0	0	0	0	0
Flavobacterium psychrophilum	96345	44	0.0007976	31	0.000537	61	0.001125	26	0.0004852	16	0.00067	22	0.0008342
Flavobacterium sp. CJ74	2294119	7	0.0001269	1	1.732e-05	1	1.844e-05	2	3.732e-05	2	8.376e-05	1	3.792e-05
Flavobacterium sp. HYN0048	2162713	2	3.626e-05	0	0	1	1.844e-05	0	0	0	0	0	0
Flavobacterium sp. HYN0056	2183896	0	0	1	1.732e-05	0	0	0	0	0	0	0	0
Flavobacterium sp. HYN0059	2175091	3	5.438e-05	0	0	0	0	0	0	0	0	0	0
Flavobacterium sp. MEBiC07310	2201181	1	1.813e-05	3	5.197e-05	0	0	6	0.000112	3	0.0001256	4	0.0001517
Flavonifractor plautii	292800	17	0.0003082	14	0.0002425	9	0.000166	3	5.598e-05	2	8.376e-05	8	0.0003034
Fluviicola taffensis	191579	406	0.00736	13	0.0002252	6	0.0001107	0	0	1	4.188e-05	1	3.792e-05
Francisella sp. TX077310	573570	4	7.251e-05	0	0	0	0	0	0	0	0	0	0
Francisella tularensis	263	0	0	1	1.732e-05	2	3.689e-05	0	0	1	4.188e-05	0	0
Frankia casuarinae	106370	8	0.000145	31	0.000537	24	0.0004427	9	0.0001679	8	0.000335	9	0.0003413
Frankia sp. EAN1pec	298653	0	0	1	1.732e-05	0	0	0	0	0	0	0	0
Frateuria aurantia	81475	5	9.064e-05	1	1.732e-05	0	0	3	5.598e-05	11	0.0004607	1	3.792e-05
Friedmanniella sagamiharensis	546874	37	0.0006707	19	0.0003291	63	0.001162	73	0.001362	42	0.001759	35	0.001327
Fuerstia marisgermanicae	1891926	0	0	1	1.732e-05	0	0	0	0	0	0	0	0
Fusobacterium hwasookii	1583098	1	1.813e-05	0	0	0	0	2	3.732e-05	0	0	1	3.792e-05
Fusobacterium nucleatum	851	0	0	0	0	1	1.844e-05	0	0	0	0	0	0
Gallaecimonas sp. HK-28	2291597	0	0	1	1.732e-05	0	0	0	0	0	0	0	0
Gallionella capsiferriformans	370405	1	1.813e-05	7	0.0001213	7	0.0001291	3	5.598e-05	5	0.0002094	13	0.000493
gamma proteobacterium HdN1	83406	7	0.0001269	9	0.0001559	7	0.0001291	7	0.0001306	3	0.0001256	4	0.0001517
Gemella morbillorum	29391	16	0.00029	11	0.0001906	19	0.0003505	4	7.464e-05	3	0.0001256	5	0.0001896
Gemmata obscuriglobus	114	321	0.005819	519	0.008991	195	0.003597	91	0.001698	64	0.00268	68	0.002579
Gemmata sp. SH-PL17	1630693	100	0.001813	143	0.002477	39	0.0007193	30	0.0005598	16	0.00067	17	0.0006446
Gemmatimonas aurantiaca	173480	80	0.00145	104	0.001802	92	0.001697	92	0.001717	74	0.003099	61	0.002313
Gemmatimonas phototrophica	1379270	169	0.003064	274	0.004746	190	0.003505	354	0.006606	184	0.007706	248	0.009404
Gemmatirosa kalamazoonesis	861299	15	0.0002719	16	0.0002772	3	5.533e-05	8	0.0001493	1	4.188e-05	4	0.0001517
Geoalkalibacter subterraneus	483547	8	0.000145	15	0.0002598	4	7.378e-05	0	0	1	4.188e-05	6	0.0002275
Geobacillus sp. GHH01	1233873	0	0	1	1.732e-05	0	0	0	0	1	4.188e-05	1	3.792e-05
Geobacillus thermodenitrificans	33940	2	3.626e-05	3	5.197e-05	6	0.0001107	1	1.866e-05	1	4.188e-05	3	0.0001138
Geobacillus thermoleovorans	33941	1	1.813e-05	0	0	1	1.844e-05	0	0	0	0	0	0
Geobacter daltonii	1203471	3	5.438e-05	0	0	0	0	0	0	0	0	2	7.584e-05
Geobacter metallireducens	28232	0	0	0	0	0	0	0	0	0	0	1	3.792e-05
Geobacter pickeringii	345632	8	0.000145	12	0.0002079	5	9.222e-05	6	0.000112	2	8.376e-05	2	7.584e-05
Geobacter sulfurreducens	35554	1	1.813e-05	1	1.732e-05	0	0	0	0	0	0	0	0
Geodermatophilus obscurus	1861	4	7.251e-05	12	0.0002079	15	0.0002767	8	0.0001493	4	0.0001675	13	0.000493
Gilliamella apicola	1196095	68	0.001233	39	0.0006756	54	0.000996	14	0.0002612	8	0.000335	6	0.0002275
Gillisia sp. Hel1_33_143	1336796	66	0.001196	4	6.929e-05	18	0.000332	21	0.0003919	18	0.0007538	7	0.0002654
Gilvibacter sp. SZ-19	754429	0	0	0	0	0	0	0	0	0	0	1	3.792e-05
Glaciecola nitratireducens	300231	60	0.001088	86	0.00149	71	0.00131	63	0.001176	53	0.00222	39	0.001479
Glutamicibacter arilaitensis	256701	0	0	5	8.661e-05	3	5.533e-05	0	0	0	0	0	0
Gordonia sp. YC-JH1	2059875	0	0	0	0	0	0	1	1.866e-05	0	0	0	0
Gottschalkia acidurici	1556	0	0	1	1.732e-05	0	0	1	1.866e-05	1	4.188e-05	2	7.584e-05
Gramella salexigens	1913577	0	0	0	0	0	0	1	1.866e-05	0	0	0	0
Granulicella mallensis	940614	1	1.813e-05	0	0	0	0	4	7.464e-05	2	8.376e-05	0	0
Granulosicoccus antarcticus	437505	67	0.001215	86	0.00149	45	0.00083	18	0.0003359	14	0.0005863	16	0.0006067
Haematospirillum jordaniae	1549855	4	7.251e-05	0	0	1	1.844e-05	1	1.866e-05	0	0	2	7.584e-05
Haemophilus influenzae	727	0	0	2	3.465e-05	0	0	0	0	0	0	0	0
Haemophilus parainfluenzae	729	0	0	1	1.732e-05	0	0	0	0	2	8.376e-05	0	0
Haliangium ochraceum	80816	158	0.002864	244	0.004227	138	0.002545	86	0.001605	83	0.003476	50	0.001896
Halioglobus pacificus	930806	0	0	0	0	0	0	0	0	1	4.188e-05	0	0
Haliscomenobacter hydrossis	2350	12	0.0002175	58	0.001005	1	1.844e-05	5	9.33e-05	0	0	5	0.0001896
Halobacillus halophilus	1570	32	0.0005801	37	0.0006409	101	0.001863	49	0.0009143	58	0.002429	101	0.00383
Halobacillus mangrovi	402384	0	0	0	0	0	0	0	0	0	0	1	3.792e-05
Halobacteriovorax marinus	97084	3	5.438e-05	1	1.732e-05	8	0.0001476	23	0.0004292	3	0.0001256	7	0.0002654
Halobacterium hubeiense	1407499	0	0	0	0	1	1.844e-05	0	0	3	0.0001256	0	0
Halobacterium salinarum	2242	0	0	0	0	65	0.001199	0	0	3	0.0001256	1	3.792e-05
Halobacterium sp. DL1	751944	196	0.003553	11	0.0001906	600	0.01107	10	0.0001866	14	0.0005863	16	0.0006067
Halogeometricum borinquense	60847	11	0.0001994	3	5.197e-05	71	0.00131	2	3.732e-05	2	8.376e-05	0	0
Halomonas sp. 1513	1883416	172	0.003118	134	0.002321	563	0.01038	51	0.0009517	179	0.007496	36	0.001365
Halomonas sp. JS92-SW72	2306583	1	1.813e-05	0	0	1	1.844e-05	0	0	0	0	0	0
Halomonas subglaciescola	29571	2	3.626e-05	0	0	0	0	0	0	0	0	0	0
Halopenitus persicus	1048396	0	0	0	0	0	0	0	0	0	0	1	3.792e-05
halophilic archaeon DL31	756883	140	0.002538	39	0.0006756	426	0.007857	52	0.0009703	73	0.003057	136	0.005157
Halorhabdus utahensis	146826	3	5.438e-05	0	0	13	0.0002398	1	1.866e-05	0	0	2	7.584e-05
Halorhodospira halochloris	1052	172	0.003118	104	0.001802	71	0.00131	69	0.001288	27	0.001131	64	0.002427
Halorhodospira halophila	1053	79	0.001432	154	0.002668	29	0.0005349	47	0.000877	21	0.0008794	42	0.001593
Halorientalis sp. IM1011	1932360	1	1.813e-05	0	0	0	0	0	0	0	0	0	0
Halorubrum lacusprofundi	2247	11	0.0001994	2	3.465e-05	9	0.000166	0	0	0	0	0	0
Halorubrum trapanicum	29284	1	1.813e-05	0	0	0	0	0	0	0	0	0	0
Halothermothrix orenii	31909	0	0	1	1.732e-05	1	1.844e-05	0	0	0	0	0	0
Halothiobacillus neapolitanus	927	1	1.813e-05	0	0	2	3.689e-05	5	9.33e-05	0	0	1	3.792e-05
Halothiobacillus sp. LS2	1860122	0	0	0	0	0	0	1	1.866e-05	0	0	0	0
Hartmannibacter diazotrophicus	1482074	1	1.813e-05	0	0	1	1.844e-05	5	9.33e-05	1	4.188e-05	4	0.0001517
Heliobacterium modesticaldum	35701	0	0	1	1.732e-05	2	3.689e-05	2	3.732e-05	0	0	0	0
Herbinix luporum	1679721	0	0	1	1.732e-05	3	5.533e-05	0	0	0	0	0	0
Hippea maritima	84405	1	1.813e-05	0	0	0	0	1	1.866e-05	0	0	0	0
Hirschia baltica	2724	1	1.813e-05	0	0	1	1.844e-05	0	0	0	0	0	0
Homo sapiens	9606	4	7.251e-05	6	0.0001039	8	0.0001476	3	5.598e-05	3	0.0001256	2	7.584e-05
Hungateiclostridium clariflavum	288965	5	9.064e-05	5	8.661e-05	8	0.0001476	3	5.598e-05	2	8.376e-05	2	7.584e-05
Hungateiclostridium saccincola	1677857	0	0	3	5.197e-05	3	5.533e-05	0	0	0	0	0	0
Hydrogenophaga crassostreae	1763535	26	0.0004713	3	5.197e-05	1	1.844e-05	14	0.0002612	8	0.000335	6	0.0002275
Hydrogenophaga sp. PBC	795665	221	0.004006	437	0.00757	168	0.003099	231	0.00431	158	0.006617	156	0.005916
Hydrogenophaga sp. RAC07	1842537	0	0	0	0	1	1.844e-05	0	0	0	0	0	0
Hydrogenophilus thermoluteolus	297	0	0	1	1.732e-05	0	0	0	0	0	0	1	3.792e-05
Hydrogenovibrio crunogenus	39765	66	0.001196	86	0.00149	119	0.002195	193	0.003601	160	0.0067	301	0.01141
Hydromonas sp. F02	2268024	3	5.438e-05	2	3.465e-05	0	0	1	1.866e-05	1	4.188e-05	4	0.0001517
Hymenobacter sp. APR13	1356852	0	0	1	1.732e-05	0	0	1	1.866e-05	1	4.188e-05	5	0.0001896
Hyphomicrobium denitrificans	53399	58	0.001051	83	0.001438	33	0.0006087	24	0.0004478	46	0.001926	16	0.0006067
Hyphomicrobium nitrativorans	1427356	22	0.0003988	72	0.001247	45	0.00083	36	0.0006718	23	0.0009632	12	0.000455
Hyphomicrobium sp. MC1	717785	14	0.0002538	0	0	0	0	2	3.732e-05	4	0.0001675	1	3.792e-05
Ichthyobacterium seriolicida	242600	0	0	0	0	5	9.222e-05	0	0	0	0	0	0
Idiomarinaceae bacterium HL-53	1298881	11	0.0001994	16	0.0002772	4	7.378e-05	5	9.33e-05	2	8.376e-05	5	0.0001896
Ignavibacterium album	591197	143	0.002592	193	0.003343	308	0.005681	105	0.001959	76	0.003183	64	0.002427
Immundisolibacter cernigliae	1810504	113	0.002048	233	0.004036	45	0.00083	29	0.0005411	46	0.001926	45	0.001706
Intestinimonas butyriciproducens	1297617	5	9.064e-05	8	0.0001386	3	5.533e-05	0	0	0	0	2	7.584e-05
Isoptericola dokdonensis	372663	0	0	0	0	0	0	2	3.732e-05	0	0	0	0
Isoptericola variabilis	139208	223	0.004043	0	0	199	0.003671	472	0.008807	15	0.0006282	31	0.001176
Isosphaera pallida	128	71	0.001287	131	0.002269	78	0.001439	29	0.0005411	23	0.0009632	16	0.0006067
Janthinobacterium sp. B9-8	1236179	0	0	6	0.0001039	1	1.844e-05	1	1.866e-05	0	0	0	0
Jeongeupia sp. USM3	1906741	6	0.0001088	24	0.0004157	19	0.0003505	16	0.0002986	17	0.0007119	8	0.0003034
Jeotgalibaca sp. PTS2502	1903686	0	0	1	1.732e-05	1	1.844e-05	0	0	0	0	0	0
Jiangella alkaliphila	419479	25	0.0004532	18	0.0003118	3	5.533e-05	73	0.001362	7	0.0002931	5	0.0001896
Jonquetella anthropi	428712	5	9.064e-05	5	8.661e-05	0	0	0	0	0	0	0	0
Ketobacter alkanivorans	1917421	6	0.0001088	2	3.465e-05	1	1.844e-05	1	1.866e-05	1	4.188e-05	1	3.792e-05
Kineococcus radiotolerans	131568	18	0.0003263	19	0.0003291	16	0.0002951	8	0.0001493	8	0.000335	9	0.0003413
Kiritimatiella glycovorans	1307763	14	0.0002538	10	0.0001732	5	9.222e-05	6	0.000112	1	4.188e-05	2	7.584e-05
Kitasatospora setae	2066	1	1.813e-05	0	0	0	0	2	3.732e-05	0	0	1	3.792e-05
Klebsiella oxytoca	571	7	0.0001269	15	0.0002598	7	0.0001291	5	9.33e-05	2	8.376e-05	4	0.0001517
Klebsiella pneumoniae	573	10	0.0001813	11	0.0001906	6	0.0001107	3	5.598e-05	2	8.376e-05	4	0.0001517
Klebsiella variicola	244366	0	0	1	1.732e-05	0	0	0	0	0	0	1	3.792e-05
Kosmotoga olearia	651457	0	0	1	1.732e-05	2	3.689e-05	0	0	0	0	0	0
Kosmotoga pacifica	1330330	1	1.813e-05	10	0.0001732	8	0.0001476	1	1.866e-05	7	0.0002931	2	7.584e-05
Kribbella flavida	182640	270	0.004895	283	0.004902	243	0.004482	2155	0.04021	179	0.007496	159	0.006029
Kutzneria albida	43357	1	1.813e-05	0	0	0	0	0	0	0	0	0	0
Kyrpidia spormannii	2055160	2	3.626e-05	1	1.732e-05	0	0	0	0	0	0	0	0
Kyrpidia tusciae	33943	0	0	0	0	1	1.844e-05	2	3.732e-05	1	4.188e-05	1	3.792e-05
Kytococcus sedentarius	1276	3	5.438e-05	3	5.197e-05	2	3.689e-05	4	7.464e-05	0	0	1	3.792e-05
Laceyella sp. FBKL4.010	2071623	179	0.003245	319	0.005526	252	0.004648	121	0.002258	93	0.003895	70	0.002654
Lachnoclostridium phytofermentans	66219	1	1.813e-05	1	1.732e-05	1	1.844e-05	0	0	0	0	0	0
Lachnospiraceae bacterium Choco86	2109690	2	3.626e-05	0	0	9	0.000166	1	1.866e-05	0	0	1	3.792e-05
Lachnospiraceae bacterium GAM79	2109691	0	0	0	0	0	0	1	1.866e-05	0	0	0	0
Lachnospiraceae bacterium oral taxon 500	712991	4	7.251e-05	4	6.929e-05	4	7.378e-05	0	0	0	0	1	3.792e-05
Lactobacillus allii	1847728	0	0	0	0	0	0	1	1.866e-05	0	0	0	0
Lactobacillus bombi	1303590	1	1.813e-05	0	0	0	0	1	1.866e-05	0	0	0	0
Lactobacillus buchneri	1581	0	0	0	0	1	1.844e-05	0	0	0	0	0	0
Lactobacillus delbrueckii	1584	30	0.0005438	45	0.0007795	45	0.00083	25	0.0004665	16	0.00067	8	0.0003034
Lactobacillus fermentum	1613	68	0.001233	126	0.002183	52	0.0009591	11	0.0002053	15	0.0006282	28	0.001062
Lactobacillus helveticus	1587	1	1.813e-05	0	0	1	1.844e-05	1	1.866e-05	0	0	0	0
Lactobacillus jensenii	109790	0	0	2	3.465e-05	0	0	0	0	0	0	0	0
Lactobacillus kullabergensis	1218493	1	1.813e-05	0	0	0	0	0	0	0	0	0	0
Lactobacillus kunkeei	148814	0	0	1	1.732e-05	0	0	0	0	0	0	0	0
Lactobacillus murinus	1622	0	0	6	0.0001039	1	1.844e-05	1	1.866e-05	0	0	2	7.584e-05
Lactobacillus paracasei	1597	258	0.004677	50	0.0008661	214	0.003947	41	0.0007651	94	0.003937	152	0.005764
Lactobacillus plantarum	1590	0	0	1	1.732e-05	1	1.844e-05	0	0	1	4.188e-05	0	0
Lactobacillus rhamnosus	47715	3	5.438e-05	1	1.732e-05	0	0	0	0	0	0	0	0
Lactococcus garvieae	1363	2	3.626e-05	1	1.732e-05	2	3.689e-05	1	1.866e-05	0	0	2	7.584e-05
Lacunisphaera limnophila	1838286	7	0.0001269	2	3.465e-05	1	1.844e-05	0	0	0	0	0	0
Laribacter hongkongensis	168471	0	0	2	3.465e-05	7	0.0001291	1	1.866e-05	0	0	1	3.792e-05
Lawsonella clevelandensis	1528099	0	0	2	3.465e-05	1	1.844e-05	1	1.866e-05	0	0	0	0
Lawsonia intracellularis	29546	2	3.626e-05	0	0	2	3.689e-05	0	0	0	0	0	0
Legionella clemsonensis	1867846	4	7.251e-05	2	3.465e-05	5	9.222e-05	7	0.0001306	1	4.188e-05	5	0.0001896
Legionella endosymbiont of Polyplax serrata	2005262	358	0.00649	562	0.009735	154	0.00284	168	0.003135	160	0.0067	195	0.007394
Legionella fallonii	96230	6	0.0001088	0	0	2	3.689e-05	0	0	0	0	1	3.792e-05
Legionella hackeliae	449	1	1.813e-05	0	0	0	0	0	0	0	0	0	0
Legionella lansingensis	45067	0	0	0	0	3	5.533e-05	0	0	0	0	0	0
Legionella oakridgensis	29423	30	0.0005438	32	0.0005543	14	0.0002582	2	3.732e-05	1	4.188e-05	3	0.0001138
Legionella pneumophila	446	7	0.0001269	2	3.465e-05	6	0.0001107	14	0.0002612	4	0.0001675	7	0.0002654
Legionella sainthelensi	28087	0	0	0	0	0	0	0	0	1	4.188e-05	0	0
Legionella spiritensis	452	0	0	1	1.732e-05	3	5.533e-05	1	1.866e-05	0	0	0	0
Legionella waltersii	66969	5	9.064e-05	3	5.197e-05	4	7.378e-05	4	7.464e-05	9	0.0003769	6	0.0002275
Lelliottia jeotgali	1907578	0	0	0	0	0	0	1	1.866e-05	0	0	0	0
Leptolyngbya boryana	1184	0	0	0	0	11	0.0002029	0	0	0	0	1	3.792e-05
Leptospira biflexa	172	0	0	1	1.732e-05	0	0	0	0	0	0	0	0
Leptospirillum ferrooxidans	180	123	0.00223	371	0.006427	34	0.0006271	15	0.0002799	12	0.0005025	27	0.001024
Leptotrichia sp. oral taxon 212	712357	0	0	0	0	1	1.844e-05	0	0	0	0	0	0
Libanicoccus massiliensis	1871022	0	0	0	0	1	1.844e-05	0	0	0	0	0	0
Limnochorda pilosa	1555112	0	0	5	8.661e-05	2	3.689e-05	6	0.000112	0	0	0	0
Listeria monocytogenes	1639	21	0.0003807	9	0.0001559	20	0.0003689	21	0.0003919	11	0.0004607	18	0.0006826
Luteibacter rhizovicinus	242606	20	0.0003626	118	0.002044	49	0.0009038	4	7.464e-05	3	0.0001256	3	0.0001138
Luteimonas sp. 100111	2006110	4	7.251e-05	5	8.661e-05	4	7.378e-05	157	0.00293	71	0.002973	49	0.001858
Luteimonas sp. JM171	1896164	15	0.0002719	42	0.0007276	36	0.000664	39	0.0007277	23	0.0009632	42	0.001593
Luteitalea pratensis	1855912	2591	0.04697	5725	0.09917	1546	0.02852	867	0.01618	799	0.03346	979	0.03712
Lutibacter sp. LPB0138	1850246	3	5.438e-05	1	1.732e-05	3	5.533e-05	1	1.866e-05	0	0	1	3.792e-05
Lysinibacillus sp. Marseille-P5727	2086577	19	0.0003444	15	0.0002598	34	0.0006271	16	0.0002986	10	0.0004188	17	0.0006446
Lysinibacillus sp. YS11	2072025	0	0	0	0	1	1.844e-05	0	0	0	0	0	0
Lysobacter capsici	435897	1	1.813e-05	2	3.465e-05	0	0	0	0	0	0	0	0
Lysobacter enzymogenes	69	32	0.0005801	45	0.0007795	11	0.0002029	6	0.000112	7	0.0002931	10	0.0003792
Lysobacter sp. TY2-98	2290922	32	0.0005801	89	0.001542	26	0.0004796	218	0.004068	24	0.001005	55	0.002086
Mageeibacillus indolicus	884684	36	0.0006526	40	0.0006929	22	0.0004058	37	0.0006904	10	0.0004188	14	0.0005309
Magnetococcus marinus	1124597	12	0.0002175	41	0.0007102	13	0.0002398	26	0.0004852	7	0.0002931	14	0.0005309
Magnetospira sp. QH-2	1288970	37	0.0006707	38	0.0006583	33	0.0006087	22	0.0004105	11	0.0004607	17	0.0006446
Magnetospirillum gryphiswaldense	55518	0	0	0	0	2	3.689e-05	0	0	0	0	0	0
Mahella australiensis	252966	28	0.0005076	37	0.0006409	58	0.00107	33	0.0006158	20	0.0008376	21	0.0007963
Maricaulis maris	74318	23	0.0004169	75	0.001299	29	0.0005349	20	0.0003732	6	0.0002513	15	0.0005688
Marichromatium purpuratum	37487	4	7.251e-05	3	5.197e-05	0	0	1	1.866e-05	0	0	0	0
Marinifilaceae bacterium SPP2	1717717	13	0.0002357	27	0.0004677	18	0.000332	6	0.000112	14	0.0005863	10	0.0003792
Mariniflexile sp. TRM1-10	2027857	0	0	0	0	2	3.689e-05	0	0	0	0	0	0
Marinilactibacillus sp. 15R	1911586	3	5.438e-05	1	1.732e-05	0	0	2	3.732e-05	0	0	1	3.792e-05
Marinithermus hydrothermalis	186192	295	0.005348	324	0.005613	115	0.002121	78	0.001455	68	0.002848	140	0.005309
Marinobacter hydrocarbonoclasticus	2743	4	7.251e-05	5	8.661e-05	12	0.0002213	18	0.0003359	6	0.0002513	6	0.0002275
Marinobacter salarius	1420917	51	0.0009245	74	0.001282	107	0.001974	59	0.001101	37	0.001549	32	0.001213
Marinobacter sp. Arc7-DN-1	2304594	2	3.626e-05	4	6.929e-05	79	0.001457	12	0.0002239	22	0.0009213	10	0.0003792
Marinomonas posidonica	936476	0	0	2	3.465e-05	0	0	0	0	0	0	1	3.792e-05
Mariprofundus aestuarium	1921086	0	0	0	0	1	1.844e-05	0	0	0	0	0	0
Maritalea myrionectae	454601	49	0.0008883	111	0.001923	58	0.00107	34	0.0006344	37	0.001549	26	0.0009859
Marivirga tractuosa	1006	8	0.000145	0	0	0	0	8	0.0001493	0	0	2	7.584e-05
Marmoricola scoriae	642780	0	0	0	0	0	0	0	0	1	4.188e-05	1	3.792e-05
Massilia putida	1141883	0	0	2	3.465e-05	0	0	0	0	0	0	0	0
Massilia sp. NR 4-1	1678028	1	1.813e-05	4	6.929e-05	1	1.844e-05	1	1.866e-05	0	0	3	0.0001138
Massilia sp. WG5	1707785	6	0.0001088	46	0.0007969	3	5.533e-05	4	7.464e-05	1	4.188e-05	1	3.792e-05
Massilia sp. YMA4	1593482	0	0	1	1.732e-05	0	0	0	0	0	0	0	0
Megasphaera elsdenii	907	241	0.004369	374	0.006479	111	0.002047	47	0.000877	38	0.001591	73	0.002768
Megasphaera hexanoica	1675036	4	7.251e-05	3	5.197e-05	22	0.0004058	0	0	0	0	0	0
Meiothermus ruber	277	0	0	0	0	0	0	1	1.866e-05	0	0	0	0
Melaminivora sp. SC2-7	2116657	0	0	2	3.465e-05	0	0	1	1.866e-05	0	0	0	0
Melaminivora sp. SC2-9	2109913	1	1.813e-05	0	0	0	0	0	0	0	0	0	0
Melioribacter roseus	1134405	53	0.0009608	118	0.002044	115	0.002121	54	0.001008	46	0.001926	36	0.001365
Melittangium boletus	83453	127	0.002302	217	0.003759	95	0.001752	72	0.001344	53	0.00222	74	0.002806
Mesoplasma lactucae	138853	13	0.0002357	43	0.0007449	14	0.0002582	2	3.732e-05	2	8.376e-05	3	0.0001138
Mesorhizobium ciceri	39645	10	0.0001813	18	0.0003118	14	0.0002582	13	0.0002426	20	0.0008376	15	0.0005688
Mesorhizobium oceanicum	1670800	1	1.813e-05	0	0	0	0	2	3.732e-05	0	0	0	0
Mesorhizobium sp. DCY119	2108445	1	1.813e-05	1	1.732e-05	1	1.844e-05	0	0	3	0.0001256	1	3.792e-05
Methanobacterium congolense	118062	0	0	0	0	0	0	0	0	1	4.188e-05	0	0
Methanobrevibacter olleyae	294671	2	3.626e-05	6	0.0001039	6	0.0001107	7	0.0001306	0	0	0	0
Methanobrevibacter sp. AbM4	224719	51	0.0009245	87	0.001507	139	0.002564	105	0.001959	37	0.001549	54	0.002048
Methanocella arvoryzae	1175445	1	1.813e-05	0	0	1	1.844e-05	2	3.732e-05	1	4.188e-05	0	0
Methanocella conradii	1175444	7	0.0001269	7	0.0001213	5	9.222e-05	2	3.732e-05	2	8.376e-05	0	0
Methanococcus voltae	2188	0	0	1	1.732e-05	0	0	0	0	0	0	0	0
methanogenic archaeon ISO4-H5	1495144	0	0	1	1.732e-05	0	0	0	0	0	0	0	0
Methanolinea tarda	263906	2	3.626e-05	0	0	3	5.533e-05	0	0	0	0	0	0
Methanoplanus limicola	2315	8	0.000145	17	0.0002945	2	3.689e-05	4	7.464e-05	0	0	6	0.0002275
Methanosaeta harundinacea	301375	13	0.0002357	8	0.0001386	30	0.0005533	14	0.0002612	7	0.0002931	8	0.0003034
Methanosarcina thermophila	2210	1	1.813e-05	5	8.661e-05	2	3.689e-05	2	3.732e-05	0	0	0	0
Methylacidiphilum infernorum	511746	2	3.626e-05	1	1.732e-05	0	0	0	0	0	0	0	0
Methylibium petroleiphilum	105560	10	0.0001813	15	0.0002598	6	0.0001107	70	0.001306	12	0.0005025	17	0.0006446
Methylobacillus flagellatus	405	12	0.0002175	3	5.197e-05	205	0.003781	148	0.002762	50	0.002094	36	0.001365
Methylobacterium aquaticum	270351	0	0	0	0	0	0	0	0	0	0	1	3.792e-05
Methylobacterium nodulans	114616	0	0	1	1.732e-05	0	0	0	0	0	0	0	0
Methylobacterium radiotolerans	31998	6	0.0001088	11	0.0001906	7	0.0001291	0	0	0	0	0	0
Methylobacterium sp. 4-46	426117	0	0	0	0	1	1.844e-05	0	0	0	0	0	0
Methylocaldum marinum	1432792	422	0.00765	227	0.003932	672	0.01239	226	0.004217	190	0.007957	83	0.003147
Methylocella silvestris	199596	19	0.0003444	22	0.0003811	26	0.0004796	14	0.0002612	6	0.0002513	10	0.0003792
Methylococcus capsulatus	414	95	0.001722	126	0.002183	199	0.003671	59	0.001101	79	0.003308	64	0.002427
Methylocystis sp. SC2	187303	127	0.002302	184	0.003187	177	0.003265	70	0.001306	41	0.001717	59	0.002237
Methylomicrobium alcaliphilum	271065	5	9.064e-05	6	0.0001039	2	3.689e-05	6	0.000112	1	4.188e-05	1	3.792e-05
Methylophaga frappieri	754477	1	1.813e-05	2	3.465e-05	26	0.0004796	3	5.598e-05	2	8.376e-05	3	0.0001138
Methylosinus trichosporium	426	66	0.001196	73	0.001265	83	0.001531	53	0.000989	38	0.001591	38	0.001441
Methylovulum psychrotolerans	1704499	0	0	0	0	2	3.689e-05	2	3.732e-05	1	4.188e-05	0	0
Micavibrio aeruginosavorus	349221	73	0.001323	74	0.001282	124	0.002287	226	0.004217	112	0.00469	143	0.005423
Microbacterium pygmaeum	370764	1	1.813e-05	1	1.732e-05	2	3.689e-05	0	0	0	0	1	3.792e-05
Microbacterium sp. PM5	2014534	0	0	0	0	1	1.844e-05	0	0	0	0	0	0
Microcella alkaliphila	279828	3	5.438e-05	5	8.661e-05	3	5.533e-05	2	3.732e-05	7	0.0002931	1	3.792e-05
Microcoleus sp. PCC 7113	1173027	1	1.813e-05	6	0.0001039	0	0	1	1.866e-05	1	4.188e-05	1	3.792e-05
Microlunatus soli	630515	6	0.0001088	5	8.661e-05	11	0.0002029	55	0.001026	7	0.0002931	9	0.0003413
Micromonospora narathiwatensis	299146	0	0	0	0	3	5.533e-05	0	0	2	8.376e-05	0	0
Micromonospora zamorensis	709883	0	0	1	1.732e-05	0	0	1	1.866e-05	0	0	0	0
Micropruina glycogenica	75385	14	0.0002538	23	0.0003984	34	0.0006271	12	0.0002239	17	0.0007119	12	0.000455
Microvirgula aerodenitrificans	57480	0	0	1	1.732e-05	1	1.844e-05	0	0	0	0	0	0
Miniimonas sp. S16	2171623	0	0	4	6.929e-05	3	5.533e-05	2	3.732e-05	41	0.001717	3	0.0001138
Modestobacter marinus	477641	40	0.0007251	40	0.0006929	78	0.001439	54	0.001008	26	0.001089	30	0.001138
Monoglobus pectinilyticus	1981510	0	0	0	0	0	0	1	1.866e-05	0	0	0	0
Moorea producens	1155739	3	5.438e-05	3	5.197e-05	0	0	1	1.866e-05	5	0.0002094	4	0.0001517
Moorella thermoacetica	1525	15	0.0002719	25	0.0004331	5	9.222e-05	0	0	9	0.0003769	5	0.0001896
Moraxella osloensis	34062	20	0.0003626	18	0.0003118	1	1.844e-05	1	1.866e-05	6	0.0002513	2	7.584e-05
Moraxellaceae bacterium HYN0046	2283318	0	0	2	3.465e-05	4	7.378e-05	0	0	1	4.188e-05	3	0.0001138
Mordavella sp. Marseille-P3756	2086584	1	1.813e-05	2	3.465e-05	0	0	1	1.866e-05	0	0	0	0
Morganella morganii	582	4	7.251e-05	3	5.197e-05	6	0.0001107	3	5.598e-05	3	0.0001256	2	7.584e-05
Muricauda lutaonensis	516051	3	5.438e-05	12	0.0002079	24	0.0004427	28	0.0005225	16	0.00067	19	0.0007205
Mycobacterium kansasii	1768	0	0	3	5.197e-05	0	0	0	0	1	4.188e-05	1	3.792e-05
Mycobacterium tuberculosis	1773	0	0	2	3.465e-05	6	0.0001107	0	0	0	0	2	7.584e-05
Mycolicibacter sinensis	875328	1	1.813e-05	0	0	0	0	2	3.732e-05	1	4.188e-05	0	0
Mycolicibacter terrae	1788	33	0.0005982	0	0	0	0	0	0	0	0	0	0
Mycoplasma arthritidis	2111	0	0	1	1.732e-05	0	0	0	0	0	0	0	0
Mycoplasma haemofelis	29501	0	0	1	1.732e-05	0	0	0	0	0	0	0	0
Mycoplasma mobile	2118	0	0	0	0	0	0	0	0	0	0	2	7.584e-05
Mycoplasma ovis	171632	0	0	1	1.732e-05	0	0	0	0	0	0	2	7.584e-05
Mycoplasma pulmonis	2107	1	1.813e-05	0	0	0	0	0	0	0	0	0	0
Mycoplasma putrefaciens	2123	0	0	0	0	1	1.844e-05	0	0	0	0	0	0
Nakamurella multipartita	53461	12	0.0002175	22	0.0003811	12	0.0002213	16	0.0002986	17	0.0007119	13	0.000493
Nakamurella panacisegetis	1090615	2	3.626e-05	0	0	0	0	0	0	0	0	0	0
Natranaerobius thermophilus	375929	25	0.0004532	49	0.0008488	55	0.001014	22	0.0004105	22	0.0009213	14	0.0005309
Natronobacterium gregoryi	44930	0	0	0	0	1	1.844e-05	0	0	0	0	0	0
Natronolimnobius aegyptiacus	745377	1	1.813e-05	1	1.732e-05	4	7.378e-05	1	1.866e-05	1	4.188e-05	4	0.0001517
Nautilia profundicola	244787	2	3.626e-05	0	0	0	0	0	0	0	0	0	0
Negativicoccus massiliensis	1702287	2	3.626e-05	2	3.465e-05	1	1.844e-05	3	5.598e-05	1	4.188e-05	0	0
Neisseria meningitidis	487	0	0	1	1.732e-05	0	0	0	0	0	0	0	0
Neisseriaceae bacterium DSM 100970	2052837	3	5.438e-05	0	0	1	1.844e-05	1	1.866e-05	0	0	0	0
Neomicrococcus aestuarii	556325	0	0	3	5.197e-05	0	0	0	0	0	0	4	0.0001517
Neorhizobium sp. NCHU2750	1825976	0	0	2	3.465e-05	0	0	0	0	0	0	0	0
Niabella ginsenosidivorans	1176587	7	0.0001269	8	0.0001386	0	0	4	7.464e-05	1	4.188e-05	1	3.792e-05
Niabella soli	446683	1	1.813e-05	1	1.732e-05	0	0	20	0.0003732	2	8.376e-05	0	0
Niastella koreensis	354356	46	0.0008339	69	0.001195	22	0.0004058	11	0.0002053	15	0.0006282	34	0.001289
Nitratifractor salsuginis	269261	1	1.813e-05	0	0	0	0	0	0	0	0	1	3.792e-05
Nitratireductor basaltis	472175	5	9.064e-05	11	0.0001906	3	5.533e-05	4	7.464e-05	6	0.0002513	1	3.792e-05
Nitratireductor sp. OM-1	1756988	3	5.438e-05	8	0.0001386	11	0.0002029	20	0.0003732	11	0.0004607	11	0.0004171
Nitratiruptor sp. SB155-2	387092	119	0.002157	167	0.002893	105	0.001937	86	0.001605	41	0.001717	63	0.002389
Nitrobacter hamburgensis	912	41	0.0007433	53	0.0009181	84	0.001549	73	0.001362	69	0.00289	26	0.0009859
Nitrosococcus halophilus	133539	86	0.001559	113	0.001957	104	0.001918	97	0.00181	52	0.002178	60	0.002275
Nitrosomonas communis	44574	19	0.0003444	27	0.0004677	4	7.378e-05	41	0.0007651	28	0.001173	13	0.000493
Nitrosomonas europaea	915	2	3.626e-05	1	1.732e-05	1	1.844e-05	7	0.0001306	1	4.188e-05	0	0
Nitrosomonas sp. AL212	153948	1	1.813e-05	0	0	0	0	0	0	0	0	0	0
Nitrososphaera viennensis	1034015	1162	0.02106	1517	0.02628	1706	0.03147	1763	0.0329	1007	0.04217	696	0.02639
Nitrosospira briensis	35799	3	5.438e-05	1	1.732e-05	0	0	0	0	7	0.0002931	0	0
Nitrospira defluvii	330214	42	0.0007614	71	0.00123	118	0.002176	48	0.0008957	51	0.002136	39	0.001479
Nitrospira japonica	1325564	133	0.002411	185	0.003205	55	0.001014	27	0.0005038	31	0.001298	35	0.001327
Nitrospira moscoviensis	42253	14	0.0002538	48	0.0008315	3	5.533e-05	1	1.866e-05	4	0.0001675	3	0.0001138
Nitrospirillum amazonense	28077	386	0.006997	185	0.003205	386	0.00712	1001	0.01868	239	0.01001	336	0.01274
Niveispirillum cyanobacteriorum	1612173	49	0.0008883	87	0.001507	39	0.0007193	82	0.00153	23	0.0009632	48	0.00182
Nocardia brasiliensis	37326	7	0.0001269	0	0	0	0	0	0	0	0	1	3.792e-05
Nocardia cyriacigeorgica	135487	13	0.0002357	12	0.0002079	18	0.000332	18	0.0003359	4	0.0001675	24	0.0009101
Nocardia nova	37330	1	1.813e-05	0	0	0	0	0	0	0	0	0	0
Nocardia seriolae	37332	0	0	4	6.929e-05	2	3.689e-05	5	9.33e-05	2	8.376e-05	0	0
Nocardioides dokdonensis	450734	123	0.00223	145	0.002512	277	0.005109	85	0.001586	74	0.003099	137	0.005195
Nocardioides sp. 78	2045452	0	0	0	0	0	0	0	0	1	4.188e-05	1	3.792e-05
Nocardioides sp. CF8	110319	0	0	0	0	0	0	0	0	2	8.376e-05	0	0
Nocardioides sp. JS614	196162	69	0.001251	92	0.001594	98	0.001808	119	0.002221	88	0.003685	69	0.002617
Nocardiopsis gilva	280236	20	0.0003626	14	0.0002425	55	0.001014	63	0.001176	21	0.0008794	6	0.0002275
Nonomuraea sp. ATCC 55076	1909395	4747	0.08605	241	0.004175	917	0.01691	7186	0.1341	699	0.02927	1182	0.04482
Nostoc linckia	92942	0	0	1	1.732e-05	1	1.844e-05	0	0	0	0	0	0
Nostoc piscinale	224012	0	0	0	0	0	0	0	0	0	0	2	7.584e-05
Nostoc sp. PCC 7524	28072	0	0	0	0	0	0	0	0	0	0	1	3.792e-05
Novibacillus thermophilus	1471761	10	0.0001813	30	0.0005197	33	0.0006087	20	0.0003732	11	0.0004607	6	0.0002275
Novosphingobium aromaticivorans	48935	24	0.0004351	35	0.0006063	13	0.0002398	18	0.0003359	14	0.0005863	35	0.001327
Novosphingobium sp. THN1	1016987	1	1.813e-05	5	8.661e-05	1	1.844e-05	1	1.866e-05	3	0.0001256	2	7.584e-05
Oceanimonas sp. GK1	511062	1	1.813e-05	0	0	0	0	0	0	0	0	0	0
Oceanithermus profundus	187137	1	1.813e-05	0	0	0	0	0	0	0	0	0	0
Oceanobacillus iheyensis	182710	0	0	7	0.0001213	0	0	1	1.866e-05	0	0	0	0
Oceanobacillus sp. 160	2052660	0	0	1	1.732e-05	10	0.0001844	3	5.598e-05	3	0.0001256	3	0.0001138
Oenococcus kitaharae	336988	13	0.0002357	28	0.000485	24	0.0004427	16	0.0002986	10	0.0004188	9	0.0003413
Oenococcus oeni	1247	1	1.813e-05	0	0	0	0	0	0	0	0	0	0
Oleiphilus messinensis	141451	2	3.626e-05	0	0	0	0	4	7.464e-05	0	0	0	0
Oleispira antarctica	188908	0	0	0	0	1	1.844e-05	0	0	0	0	0	0
Oligotropha carboxidovorans	40137	44	0.0007976	39	0.0006756	32	0.0005902	30	0.0005598	21	0.0008794	15	0.0005688
Olsenella sp. GAM18	2109685	8	0.000145	9	0.0001559	14	0.0002582	12	0.0002239	4	0.0001675	2	7.584e-05
Olsenella sp. Marseille-P2300	1805478	4	7.251e-05	8	0.0001386	1	1.844e-05	3	5.598e-05	0	0	0	0
Olsenella uli	133926	1	1.813e-05	1	1.732e-05	1	1.844e-05	0	0	0	0	0	0
Opitutaceae bacterium TAV5	794903	6	0.0001088	14	0.0002425	2	3.689e-05	0	0	5	0.0002094	1	3.792e-05
Opitutus sp. GAS368	1882749	4	7.251e-05	2	3.465e-05	0	0	0	0	0	0	0	0
Opitutus terrae	107709	30	0.0005438	43	0.0007449	24	0.0004427	9	0.0001679	12	0.0005025	10	0.0003792
Ornithinimicrobium sp. AMA3305	2283195	6	0.0001088	14	0.0002425	7	0.0001291	14	0.0002612	8	0.000335	6	0.0002275
Ornithobacterium rhinotracheale	28251	3	5.438e-05	0	0	0	0	3	5.598e-05	2	8.376e-05	7	0.0002654
Oscillatoria acuminata	118323	7	0.0001269	11	0.0001906	31	0.0005718	8	0.0001493	11	0.0004607	17	0.0006446
Oscillatoriales cyanobacterium JSC-12	864702	1	1.813e-05	1	1.732e-05	3	5.533e-05	26	0.0004852	4	0.0001675	5	0.0001896
Oscillibacter sp. PEA192	2109687	0	0	0	0	0	0	1	1.866e-05	0	0	0	0
Owenweeksia hongkongensis	253245	2	3.626e-05	0	0	0	0	1	1.866e-05	1	4.188e-05	8	0.0003034
Paenalcaligenes hominis	643674	1	1.813e-05	0	0	0	0	1	1.866e-05	0	0	0	0
Paenibacillus beijingensis	1126833	3	5.438e-05	2	3.465e-05	1	1.844e-05	2	3.732e-05	0	0	1	3.792e-05
Paenibacillus bovis	1616788	3	5.438e-05	13	0.0002252	16	0.0002951	3	5.598e-05	0	0	1	3.792e-05
Paenibacillus crassostreae	1763538	4	7.251e-05	3	5.197e-05	8	0.0001476	1	1.866e-05	2	8.376e-05	1	3.792e-05
Paenibacillus glucanolyticus	59843	0	0	2	3.465e-05	1	1.844e-05	1	1.866e-05	0	0	0	0
Paenibacillus graminis	189425	0	0	0	0	1	1.844e-05	0	0	0	0	0	0
Paenibacillus ihbetae	1870820	0	0	2	3.465e-05	1	1.844e-05	0	0	0	0	1	3.792e-05
Paenibacillus larvae	1464	5	9.064e-05	6	0.0001039	3	5.533e-05	0	0	0	0	1	3.792e-05
Paenibacillus mucilaginosus	61624	3	5.438e-05	2	3.465e-05	1	1.844e-05	1	1.866e-05	1	4.188e-05	0	0
Paenibacillus naphthalenovorans	162209	0	0	1	1.732e-05	1	1.844e-05	0	0	0	0	1	3.792e-05
Paenibacillus polymyxa	1406	12	0.0002175	18	0.0003118	9	0.000166	10	0.0001866	6	0.0002513	1	3.792e-05
Paenibacillus riograndensis	483937	0	0	0	0	0	0	0	0	0	0	2	7.584e-05
Paenibacillus sp. 32O-W	1695218	0	0	0	0	0	0	1	1.866e-05	0	0	0	0
Paenibacillus sp. BIHB4019	1870819	4	7.251e-05	3	5.197e-05	18	0.000332	23	0.0004292	4	0.0001675	1	3.792e-05
Paenibacillus sp. IHBB 10380	1566358	1	1.813e-05	4	6.929e-05	16	0.0002951	0	0	2	8.376e-05	2	7.584e-05
Paenibacillus sp. JDR-2	324057	1	1.813e-05	2	3.465e-05	1	1.844e-05	7	0.0001306	2	8.376e-05	1	3.792e-05
Paenibacillus stellifer	169760	4	7.251e-05	11	0.0001906	15	0.0002767	11	0.0002053	4	0.0001675	3	0.0001138
Paenibacillus swuensis	1178515	1	1.813e-05	0	0	3	5.533e-05	0	0	0	0	0	0
Paenibacillus yonginensis	1462996	2	3.626e-05	1	1.732e-05	2	3.689e-05	1	1.866e-05	0	0	0	0
Paeniclostridium sordellii	1505	2	3.626e-05	8	0.0001386	11	0.0002029	1	1.866e-05	3	0.0001256	4	0.0001517
Pajaroellobacter abortibovis	1882918	0	0	1	1.732e-05	0	0	0	0	0	0	0	0
Paludibacter propionicigenes	185300	2	3.626e-05	0	0	0	0	0	0	2	8.376e-05	0	0
Paludisphaera borealis	1387353	2	3.626e-05	1	1.732e-05	0	0	3	5.598e-05	1	4.188e-05	0	0
Pantoea sp. PSNIH2	1484157	0	0	0	0	0	0	0	0	1	4.188e-05	0	0
Paraburkholderia hospita	169430	0	0	1	1.732e-05	0	0	0	0	0	0	0	0
Paraburkholderia rhizoxinica	412963	162	0.002937	252	0.004365	210	0.003873	159	0.002967	132	0.005528	160	0.006067
Paraburkholderia sp. SOS3	1926494	1	1.813e-05	0	0	0	0	0	0	5	0.0002094	0	0
Parachlamydia acanthamoebae	83552	7	0.0001269	10	0.0001732	7	0.0001291	3	5.598e-05	6	0.0002513	1	3.792e-05
Paracoccus aminovorans	34004	0	0	0	0	0	0	3	5.598e-05	5	0.0002094	0	0
Paracoccus denitrificans	266	0	0	0	0	0	0	1	1.866e-05	0	0	1	3.792e-05
Paracoccus sp. CBA4604	2065379	0	0	0	0	0	0	0	0	0	0	1	3.792e-05
Paracoccus sp. SC2-6	2259340	4	7.251e-05	0	0	7	0.0001291	5	9.33e-05	2	8.376e-05	17	0.0006446
Paracoccus zhejiangensis	1077935	1	1.813e-05	3	5.197e-05	3	5.533e-05	2	3.732e-05	1	4.188e-05	4	0.0001517
Parageobacillus thermoglucosidasius	1426	0	0	0	0	1	1.844e-05	0	0	0	0	0	0
Paraglaciecola psychrophila	326544	10	0.0001813	38	0.0006583	27	0.000498	12	0.0002239	12	0.0005025	15	0.0005688
Paraphotobacterium marinum	1755811	0	0	0	0	0	0	2	3.732e-05	1	4.188e-05	0	0
Pararhodospirillum photometricum	1084	9	0.0001632	17	0.0002945	14	0.0002582	19	0.0003545	14	0.0005863	15	0.0005688
Parasaccharibacter apium	1510841	8	0.000145	7	0.0001213	14	0.0002582	9	0.0001679	6	0.0002513	7	0.0002654
Parvibaculum lavamentivorans	256618	0	0	0	0	1	1.844e-05	2	3.732e-05	0	0	4	0.0001517
Parvimonas micra	33033	0	0	1	1.732e-05	2	3.689e-05	0	0	0	0	0	0
Parvularcula bermudensis	208216	0	0	1	1.732e-05	0	0	0	0	0	0	0	0
Pasteurella multocida	747	0	0	0	0	0	0	0	0	0	0	1	3.792e-05
Paucibacter sp. KCTC 42545	1768242	9	0.0001632	17	0.0002945	6	0.0001107	1	1.866e-05	2	8.376e-05	5	0.0001896
Pedobacter cryoconitis	188932	1	1.813e-05	1	1.732e-05	0	0	0	0	0	0	0	0
Pelagibacterium halotolerans	531813	232	0.004206	95	0.001646	294	0.005423	125	0.002332	95	0.003978	145	0.005498
Pelobacter acetylenicus	29542	1	1.813e-05	2	3.465e-05	1	1.844e-05	1	1.866e-05	1	4.188e-05	0	0
Pelobacter carbinolicus	19	32	0.0005801	48	0.0008315	22	0.0004058	30	0.0005598	22	0.0009213	34	0.001289
Pelobacter propionicus	29543	3	5.438e-05	1	1.732e-05	0	0	1	1.866e-05	1	4.188e-05	0	0
Pelobacter sp. SFB93	1842532	8	0.000145	31	0.000537	4	7.378e-05	5	9.33e-05	2	8.376e-05	6	0.0002275
Peptoclostridium acidaminophilum	1731	31	0.000562	39	0.0006756	4	7.378e-05	7	0.0001306	3	0.0001256	8	0.0003034
Peptoniphilus sp. ING2-D1G	1912856	1	1.813e-05	11	0.0001906	1	1.844e-05	0	0	1	4.188e-05	0	0
Persicobacter sp. JZB09	1085624	0	0	0	0	0	0	0	0	0	0	1	3.792e-05
Phenylobacterium sp. HYN0004	2201350	3	5.438e-05	4	6.929e-05	2	3.689e-05	5	9.33e-05	13	0.0005444	11	0.0004171
Phenylobacterium zucineum	284016	14	0.0002538	6	0.0001039	17	0.0003136	9	0.0001679	14	0.0005863	10	0.0003792
Phoenicibacter massiliensis	1944646	7	0.0001269	21	0.0003638	78	0.001439	43	0.0008024	32	0.00134	33	0.001251
Photobacterium damselae	38293	1	1.813e-05	2	3.465e-05	1	1.844e-05	2	3.732e-05	0	0	1	3.792e-05
Photobacterium gaetbulicola	1295392	1	1.813e-05	0	0	0	0	0	0	0	0	0	0
Photobacterium profundum	74109	0	0	0	0	1	1.844e-05	0	0	0	0	1	3.792e-05
Phreatobacter cathodiphilus	1868589	7	0.0001269	9	0.0001559	3	5.533e-05	2	3.732e-05	1	4.188e-05	0	0
Phycicoccus dokdonensis	443156	14	0.0002538	36	0.0006236	16	0.0002951	23	0.0004292	12	0.0005025	16	0.0006067
Phycisphaera mikurensis	547188	205	0.003716	293	0.005076	178	0.003283	81	0.001511	52	0.002178	86	0.003261
Phycisphaerae bacterium L21-RPul-D3	1940790	31	0.000562	34	0.000589	19	0.0003505	49	0.0009143	21	0.0008794	28	0.001062
Phycisphaerae bacterium ST-PulAB-D4	1941349	39	0.000707	58	0.001005	18	0.000332	14	0.0002612	5	0.0002094	10	0.0003792
Picrophilus torridus	82076	0	0	0	0	1	1.844e-05	0	0	0	0	0	0
Pimelobacter simplex	2045	100	0.001813	64	0.001109	139	0.002564	54	0.001008	62	0.002596	36	0.001365
Pirellula staleyi	125	1924	0.03488	2636	0.04566	2641	0.04871	1607	0.02999	919	0.03849	853	0.03235
Piscirickettsia salmonis	1238	0	0	0	0	0	0	2	3.732e-05	0	0	0	0
Planctomyces sp. SH-PL14	1632864	385	0.006979	364	0.006306	481	0.008872	375	0.006997	227	0.009506	255	0.00967
Planctomyces sp. SH-PL62	1636152	51	0.0009245	2	3.465e-05	0	0	6	0.000112	0	0	2	7.584e-05
Planctopirus limnophila	120	282	0.005112	450	0.007795	142	0.002619	95	0.001773	71	0.002973	89	0.003375
Plantactinospora sp. KBS50	2024580	0	0	0	0	0	0	3	5.598e-05	1	4.188e-05	1	3.792e-05
Plautia stali symbiont	891974	0	0	0	0	1	1.844e-05	0	0	0	0	1	3.792e-05
Polaribacter sp. KT25b	1855336	0	0	0	0	0	0	0	0	0	0	1	3.792e-05
Polynucleobacter necessarius	576610	0	0	0	0	1	1.844e-05	0	0	0	0	0	0
Pontimonas salivibrio	1159327	0	0	1	1.732e-05	2	3.689e-05	0	0	1	4.188e-05	3	0.0001138
Pragia fontium	82985	1	1.813e-05	3	5.197e-05	4	7.378e-05	0	0	7	0.0002931	4	0.0001517
Propionimicrobium sp. Marseille-P3275	1871034	3	5.438e-05	4	6.929e-05	15	0.0002767	12	0.0002239	2	8.376e-05	5	0.0001896
Prosthecochloris aestuarii	1102	1	1.813e-05	1	1.732e-05	0	0	0	0	0	0	0	0
Proteus mirabilis	584	0	0	1	1.732e-05	0	0	1	1.866e-05	0	0	0	0
Pseudarcicella sp. HME7025	2183547	0	0	1	1.732e-05	0	0	0	0	0	0	0	0
Pseudodesulfovibrio aespoeensis	182210	1	1.813e-05	1	1.732e-05	0	0	1	1.866e-05	0	0	0	0
Pseudodesulfovibrio piezophilus	879567	2	3.626e-05	0	0	0	0	0	0	1	4.188e-05	0	0
Pseudoflavitalea sp. 5GH32-13	2315862	85	0.001541	66	0.001143	41	0.0007562	131	0.002444	55	0.002303	44	0.001668
Pseudogulbenkiania sp. NH8B	748280	0	0	0	0	0	0	1	1.866e-05	0	0	0	0
Pseudohongiella spirulinae	1249552	0	0	1	1.732e-05	1	1.844e-05	0	0	2	8.376e-05	2	7.584e-05
Pseudolabrys taiwanensis	331696	26	0.0004713	38	0.0006583	8	0.0001476	4	7.464e-05	3	0.0001256	7	0.0002654
Pseudomonas aeruginosa	287	5	9.064e-05	2	3.465e-05	4	7.378e-05	2	3.732e-05	1	4.188e-05	5	0.0001896
Pseudomonas arsenicoxydans	702115	0	0	0	0	0	0	0	0	0	0	1	3.792e-05
Pseudomonas azotoformans	47878	1	1.813e-05	0	0	0	0	1	1.866e-05	0	0	0	0
Pseudomonas balearica	74829	2	3.626e-05	16	0.0002772	21	0.0003873	17	0.0003172	6	0.0002513	11	0.0004171
Pseudomonas extremorientalis	169669	0	0	0	0	1	1.844e-05	0	0	0	0	0	0
Pseudomonas furukawaii	1149133	27	0.0004895	50	0.0008661	11	0.0002029	10	0.0001866	9	0.0003769	9	0.0003413
Pseudomonas litoralis	797277	1	1.813e-05	1	1.732e-05	1	1.844e-05	0	0	0	0	0	0
Pseudomonas mucidolens	46679	0	0	1	1.732e-05	1	1.844e-05	0	0	0	0	0	0
Pseudomonas pohangensis	364197	1	1.813e-05	0	0	0	0	0	0	0	0	0	0
Pseudomonas psychrotolerans	237610	1	1.813e-05	0	0	0	0	0	0	0	0	0	0
Pseudomonas putida	303	1	1.813e-05	1	1.732e-05	0	0	1	1.866e-05	1	4.188e-05	0	0
Pseudomonas salegens	1434072	1	1.813e-05	0	0	0	0	0	0	0	0	0	0
Pseudomonas sp. S-6-2	1931241	1	1.813e-05	2	3.465e-05	0	0	1	1.866e-05	0	0	0	0
Pseudomonas stutzeri	316	2	3.626e-05	0	0	0	0	0	0	1	4.188e-05	0	0
Pseudomonas syringae	317	1	1.813e-05	0	0	3	5.533e-05	13	0.0002426	0	0	0	0
Pseudonocardia dioxanivorans	240495	114	0.002067	47	0.0008142	38	0.0007009	1354	0.02527	54	0.002261	88	0.003337
Pseudonocardia sp. EC080625-04	1096868	4	7.251e-05	1	1.732e-05	0	0	0	0	0	0	1	3.792e-05
Pseudopropionibacterium propionicum	1750	1	1.813e-05	2	3.465e-05	3	5.533e-05	2	3.732e-05	0	0	0	0
Pseudorhodoplanes sinuspersici	1235591	110	0.001994	146	0.002529	89	0.001642	47	0.000877	31	0.001298	46	0.001744
Pseudothermotoga hypogea	57487	946	0.01715	1663	0.02881	1118	0.02062	333	0.006214	336	0.01407	175	0.006636
Pseudoxanthomonas spadix	415229	4	7.251e-05	5	8.661e-05	4	7.378e-05	3	5.598e-05	0	0	5	0.0001896
Pseudoxanthomonas suwonensis	314722	58	0.001051	31	0.000537	62	0.001144	116	0.002165	58	0.002429	169	0.006409
Psychroflexus torquis	57029	0	0	0	0	1	1.844e-05	0	0	0	0	0	0
Psychromicrobium lacuslunae	1618207	1	1.813e-05	0	0	0	0	0	0	0	0	0	0
Psychromonas ingrahamii	357794	0	0	0	0	0	0	1	1.866e-05	0	0	0	0
Ralstonia insidiosa	190721	0	0	0	0	0	0	2	3.732e-05	0	0	0	0
Ramlibacter tataouinensis	94132	0	0	3	5.197e-05	2	3.689e-05	0	0	0	0	0	0
Rathayibacter tritici	33888	1	1.813e-05	0	0	0	0	0	0	0	0	0	0
Rhizobacter gummiphilus	946333	0	0	2	3.465e-05	2	3.689e-05	0	0	2	8.376e-05	0	0
Rhizobium sp. NT-26	1125847	131	0.002375	144	0.002494	212	0.00391	80	0.001493	65	0.002722	48	0.00182
Rhizorhabdus dicambivorans	1850238	0	0	3	5.197e-05	0	0	23	0.0004292	6	0.0002513	3	0.0001138
Rhodanobacter denitrificans	666685	1	1.813e-05	0	0	0	0	8	0.0001493	0	0	0	0
Rhodobacter sp. LPB0142	1850250	28	0.0005076	23	0.0003984	24	0.0004427	19	0.0003545	6	0.0002513	14	0.0005309
Rhodobacter sphaeroides	1063	1	1.813e-05	6	0.0001039	2	3.689e-05	2	3.732e-05	1	4.188e-05	3	0.0001138
Rhodobacteraceae bacterium BAR1	2171755	0	0	0	0	0	0	0	0	0	0	1	3.792e-05
Rhodobacteraceae bacterium QY30	2033435	0	0	1	1.732e-05	1	1.844e-05	0	0	0	0	1	3.792e-05
Rhodococcus coprophilus	38310	2	3.626e-05	0	0	0	0	0	0	0	0	0	0
Rhodococcus opacus	37919	1	1.813e-05	2	3.465e-05	3	5.533e-05	0	0	2	8.376e-05	0	0
Rhodococcus sp. PBTS 1	1653478	9	0.0001632	7	0.0001213	10	0.0001844	5	9.33e-05	8	0.000335	6	0.0002275
Rhodococcus sp. S2-17	1990687	5	9.064e-05	3	5.197e-05	11	0.0002029	0	0	2	8.376e-05	0	0
Rhodoluna lacicola	529884	1	1.813e-05	0	0	38	0.0007009	2	3.732e-05	3	0.0001256	3	0.0001138
Rhodomicrobium vannielii	1069	5	9.064e-05	26	0.0004504	30	0.0005533	8	0.0001493	3	0.0001256	3	0.0001138
Rhodopirellula baltica	265606	24	0.0004351	12	0.0002079	44	0.0008116	32	0.0005971	31	0.001298	14	0.0005309
Rhodoplanes sp. Z2-YC6860	674703	69	0.001251	123	0.002131	98	0.001808	37	0.0006904	29	0.001214	20	0.0007584
Rhodopseudomonas palustris	1076	22	0.0003988	12	0.0002079	20	0.0003689	113	0.002109	8	0.000335	2	7.584e-05
Rhodospirillaceae bacterium SCSIO 08040	2220096	144	0.00261	61	0.001057	209	0.003855	72	0.001344	61	0.002555	57	0.002161
Rhodospirillum centenum	34018	0	0	1	1.732e-05	1	1.844e-05	0	0	0	0	0	0
Rhodospirillum rubrum	1085	502	0.0091	891	0.01543	614	0.01133	1191	0.02222	308	0.0129	454	0.01722
Rhodothermus marinus	29549	0	0	0	0	0	0	0	0	1	4.188e-05	0	0
Rhodovulum sp. P5	1564506	5	9.064e-05	2	3.465e-05	11	0.0002029	10	0.0001866	1	4.188e-05	2	7.584e-05
Rickettsia montanensis	33991	0	0	0	0	0	0	1	1.866e-05	0	0	0	0
Riemerella anatipestifer	34085	0	0	1	1.732e-05	1	1.844e-05	5	9.33e-05	0	0	2	7.584e-05
Rivularia sp. PCC 7116	373994	1	1.813e-05	0	0	1	1.844e-05	0	0	0	0	0	0
Roseburia hominis	301301	4	7.251e-05	6	0.0001039	6	0.0001107	2	3.732e-05	1	4.188e-05	3	0.0001138
Roseiflexus sp. RS-1	357808	2	3.626e-05	1	1.732e-05	0	0	4	7.464e-05	1	4.188e-05	2	7.584e-05
Rothia dentocariosa	2047	2	3.626e-05	0	0	1	1.844e-05	0	0	0	0	0	0
Rubinisphaera brasiliensis	119	1293	0.02344	779	0.01349	1615	0.02979	1071	0.01998	488	0.02044	485	0.01839
Rubrobacter indioceani	2051957	10	0.0001813	20	0.0003465	6	0.0001107	10	0.0001866	4	0.0001675	7	0.0002654
Rubrobacter xylanophilus	49319	403	0.007306	494	0.008558	505	0.009315	337	0.006288	207	0.008669	208	0.007887
Rufibacter sp. DG15C	1379909	14	0.0002538	9	0.0001559	4	7.378e-05	4	7.464e-05	1	4.188e-05	2	7.584e-05
Ruminiclostridium cellulolyticum	1521	1	1.813e-05	6	0.0001039	1	1.844e-05	3	5.598e-05	1	4.188e-05	2	7.584e-05
Ruminococcaceae bacterium CPB6	1572656	3	5.438e-05	4	6.929e-05	0	0	1	1.866e-05	2	8.376e-05	0	0
Ruminococcus bicirculans	1160721	0	0	0	0	1	1.844e-05	0	0	0	0	0	0
Rummeliibacillus stabekisii	241244	4	7.251e-05	0	0	4	7.378e-05	0	0	0	0	0	0
Saccharomonospora viridis	1852	0	0	0	0	1	1.844e-05	0	0	0	0	0	0
Saccharospirillum mangrovi	2161747	111	0.002012	35	0.0006063	278	0.005128	962	0.01795	32	0.00134	45	0.001706
Saccharothrix espanaensis	103731	1	1.813e-05	0	0	0	0	0	0	0	0	0	0
Salimicrobium jeotgali	1230341	0	0	1	1.732e-05	0	0	0	0	0	0	1	3.792e-05
Salinarchaeum sp. Harcht-Bsk1	1333523	118	0.002139	38	0.0006583	440	0.008116	19	0.0003545	31	0.001298	48	0.00182
Salinibacter ruber	146919	150	0.002719	123	0.002131	218	0.004021	40	0.0007464	32	0.00134	12	0.000455
Salinicola tamaricis	1771309	1	1.813e-05	0	0	2	3.689e-05	0	0	2	8.376e-05	0	0
Salinisphaera sp. LB1	2183911	5	9.064e-05	1	1.732e-05	20	0.0003689	2	3.732e-05	11	0.0004607	4	0.0001517
Salipiger profundus	1229727	0	0	0	0	1	1.844e-05	0	0	0	0	0	0
Salmonella enterica	28901	1	1.813e-05	2	3.465e-05	3	5.533e-05	3	5.598e-05	2	8.376e-05	2	7.584e-05
Sandaracinus amylolyticus	927083	240	0.004351	290	0.005024	164	0.003025	339	0.006326	110	0.004607	97	0.003678
Sanguibacter keddieii	60920	55	0.000997	2	3.465e-05	15	0.0002767	5	9.33e-05	1	4.188e-05	0	0
Saprospira grandis	1008	12	0.0002175	2	3.465e-05	6	0.0001107	8	0.0001493	10	0.0004188	12	0.000455
secondary endosymbiont of Ctenarytaina eucalypti	1199245	0	0	0	0	0	0	0	0	0	0	1	3.792e-05
secondary endosymbiont of Heteropsylla cubana	134287	0	0	0	0	2	3.689e-05	0	0	2	8.376e-05	2	7.584e-05
secondary endosymbiont of Trabutina mannipara	1835721	1	1.813e-05	0	0	1	1.844e-05	0	0	0	0	0	0
Sedimenticola thiotaurini	1543721	0	0	0	0	1	1.844e-05	2	3.732e-05	1	4.188e-05	0	0
Sediminispirochaeta smaragdinae	55206	0	0	0	0	1	1.844e-05	0	0	0	0	0	0
Segniliparus rotundus	286802	0	0	0	0	0	0	1	1.866e-05	0	0	0	0
Serratia plymuthica	82996	17	0.0003082	27	0.0004677	13	0.0002398	6	0.000112	1	4.188e-05	6	0.0002275
Shewanella baltica	62322	12	0.0002175	9	0.0001559	0	0	2	3.732e-05	0	0	1	3.792e-05
Shewanella bicestrii	2018305	1	1.813e-05	3	5.197e-05	0	0	0	0	1	4.188e-05	1	3.792e-05
Shewanella sp. Pdp11	2059264	0	0	1	1.732e-05	1	1.844e-05	0	0	0	0	0	0
Shigella flexneri	623	7	0.0001269	8	0.0001386	1	1.844e-05	3	5.598e-05	1	4.188e-05	2	7.584e-05
Shinella sp. HZN7	879274	32	0.0005801	30	0.0005197	24	0.0004427	45	0.0008397	44	0.001843	15	0.0005688
Simkania negevensis	83561	16	0.00029	10	0.0001732	13	0.0002398	1	1.866e-05	0	0	3	0.0001138
Singulisphaera acidiphila	466153	136	0.002465	86	0.00149	46	0.0008485	86	0.001605	39	0.001633	22	0.0008342
Sinomonas atrocyanea	37927	0	0	3	5.197e-05	2	3.689e-05	5	9.33e-05	0	0	2	7.584e-05
Sinorhizobium fredii	380	1	1.813e-05	0	0	0	0	17	0.0003172	12	0.0005025	4	0.0001517
Sinorhizobium sp. RAC02	1842534	0	0	1	1.732e-05	0	0	0	0	0	0	0	0
Slackia heliotrinireducens	84110	0	0	0	0	0	0	1	1.866e-05	0	0	0	0
Solibacillus silvestris	76853	2	3.626e-05	3	5.197e-05	3	5.533e-05	2	3.732e-05	1	4.188e-05	1	3.792e-05
Solibacillus sp. R5-41	2048654	2	3.626e-05	1	1.732e-05	3	5.533e-05	1	1.866e-05	0	0	0	0
Solimonas sp. K1W22B-7	2303331	10	0.0001813	7	0.0001213	4	7.378e-05	5	9.33e-05	3	0.0001256	7	0.0002654
Solitalea canadensis	995	24	0.0004351	14	0.0002425	4	7.378e-05	5	9.33e-05	2	8.376e-05	2	7.584e-05
Sorangium cellulosum	56	506	0.009173	693	0.012	194	0.003578	187	0.003489	150	0.006282	208	0.007887
Sphaerobacter thermophilus	2057	859	0.01557	593	0.01027	1431	0.02639	209	0.0039	204	0.008543	274	0.01039
Sphaerochaeta globosa	1131703	331	0.006	421	0.007293	419	0.007728	167	0.003116	113	0.004732	163	0.006181
Sphaerochaeta pleomorpha	1131707	0	0	2	3.465e-05	1	1.844e-05	0	0	0	0	1	3.792e-05
Sphingobacterium mizutaii	1010	0	0	4	6.929e-05	1	1.844e-05	0	0	0	0	2	7.584e-05
Sphingobacterium sp. 21	743722	335	0.006073	26	0.0004504	65	0.001199	121	0.002258	81	0.003392	160	0.006067
Sphingobacterium sp. ML3W	1538644	0	0	1	1.732e-05	0	0	1	1.866e-05	0	0	0	0
Sphingobium indicum	332055	0	0	1	1.732e-05	1	1.844e-05	0	0	0	0	0	0
Sphingobium sp. SCG-1	2072936	6	0.0001088	0	0	0	0	67	0.00125	1	4.188e-05	1	3.792e-05
Sphingobium sp. SYK-6	627192	0	0	0	0	0	0	2	3.732e-05	0	0	1	3.792e-05
Sphingobium sp. TKS	1315974	0	0	0	0	0	0	1	1.866e-05	0	0	0	0
Sphingobium sp. YG1	2082188	0	0	0	0	0	0	1	1.866e-05	0	0	0	0
Sphingomonas hengshuiensis	1609977	46	0.0008339	68	0.001178	198	0.003652	121	0.002258	58	0.002429	46	0.001744
Sphingomonas indica	941907	215	0.003898	354	0.006132	542	0.009997	1178	0.02198	302	0.01265	298	0.0113
Sphingomonas koreensis	93064	64	0.00116	77	0.001334	153	0.002822	62	0.001157	52	0.002178	44	0.001668
Sphingomonas sp. JJ-A5	1921510	1	1.813e-05	1	1.732e-05	1	1.844e-05	2	3.732e-05	0	0	3	0.0001138
Sphingomonas sp. KC8	1030157	78	0.001414	98	0.001698	140	0.002582	153	0.002855	92	0.003853	89	0.003375
Sphingomonas sp. LK11	1390395	0	0	0	0	3	5.533e-05	0	0	0	0	0	0
Sphingomonas sp. MM-1	745310	0	0	0	0	0	0	1	1.866e-05	0	0	0	0
Sphingopyxis sp. LPB0140	1913578	0	0	1	1.732e-05	6	0.0001107	2	3.732e-05	1	4.188e-05	0	0
Sphingopyxis sp. WS5A3p	2054227	1	1.813e-05	0	0	1	1.844e-05	0	0	0	0	0	0
Sphingorhabdus sp. Alg231-15	1922222	4	7.251e-05	0	0	0	0	4	7.464e-05	0	0	2	7.584e-05
Spiribacter curvatus	1335757	3	5.438e-05	4	6.929e-05	8	0.0001476	39	0.0007277	6	0.0002513	4	0.0001517
Spiribacter salinus	1335746	1	1.813e-05	1	1.732e-05	2	3.689e-05	1	1.866e-05	0	0	1	3.792e-05
Spirochaeta africana	46355	25	0.0004532	14	0.0002425	28	0.0005165	17	0.0003172	10	0.0004188	13	0.000493
Spirochaeta thermophila	154	1	1.813e-05	1	1.732e-05	1	1.844e-05	0	0	0	0	0	0
Spiroplasma apis	2137	1	1.813e-05	0	0	0	0	0	0	0	0	0	0
Spiroplasma taiwanense	2145	0	0	0	0	0	0	1	1.866e-05	0	0	0	0
Spongiibacter sp. IMCC21906	1620392	1	1.813e-05	0	0	0	0	1	1.866e-05	0	0	0	0
Stackebrandtia nassauensis	283811	5266	0.09546	268	0.004643	798	0.01472	3533	0.06593	804	0.03367	508	0.01926
Staphylococcus aureus	1280	4	7.251e-05	8	0.0001386	11	0.0002029	1	1.866e-05	3	0.0001256	3	0.0001138
Staphylococcus condimenti	70255	0	0	0	0	0	0	0	0	2	8.376e-05	0	0
Staphylococcus epidermidis	1282	201	0.003644	339	0.005872	823	0.01518	513	0.009573	235	0.009841	292	0.01107
Staphylococcus nepalensis	214473	1	1.813e-05	0	0	0	0	0	0	0	0	0	0
Staphylococcus pasteuri	45972	1	1.813e-05	0	0	0	0	0	0	0	0	0	0
Staphylococcus pettenkoferi	170573	2	3.626e-05	1	1.732e-05	5	9.222e-05	1	1.866e-05	1	4.188e-05	1	3.792e-05
Starkeya novella	921	1	1.813e-05	3	5.197e-05	1	1.844e-05	2	3.732e-05	0	0	1	3.792e-05
Stenotrophomonas acidaminiphila	128780	0	0	0	0	0	0	1	1.866e-05	0	0	1	3.792e-05
Steroidobacter denitrificans	465721	748	0.01356	769	0.01332	475	0.008761	898	0.01676	616	0.0258	729	0.02764
Stigmatella aurantiaca	41	13	0.0002357	22	0.0003811	9	0.000166	5	9.33e-05	2	8.376e-05	2	7.584e-05
Streptococcus parauberis	1348	0	0	0	0	0	0	0	0	1	4.188e-05	1	3.792e-05
Streptococcus pneumoniae	1313	1	1.813e-05	0	0	0	0	0	0	0	0	0	0
Streptococcus pyogenes	1314	4	7.251e-05	3	5.197e-05	5	9.222e-05	14	0.0002612	10	0.0004188	9	0.0003413
Streptococcus suis	1307	0	0	0	0	0	0	0	0	1	4.188e-05	0	0
Streptomyces albireticuli	1940	0	0	0	0	0	0	0	0	0	0	1	3.792e-05
Streptomyces cattleya	29303	0	0	0	0	0	0	1	1.866e-05	0	0	0	0
Streptomyces davaonensis	348043	0	0	0	0	2	3.689e-05	0	0	0	0	0	0
Streptomyces glaucescens	1907	0	0	1	1.732e-05	0	0	0	0	0	0	0	0
Streptomyces globosus	68209	23	0.0004169	5	8.661e-05	30	0.0005533	324	0.006046	8	0.000335	17	0.0006446
Streptomyces lavendulae	1914	0	0	1	1.732e-05	0	0	0	0	0	0	0	0
Streptomyces lividans	1916	0	0	0	0	0	0	0	0	0	0	1	3.792e-05
Streptomyces lydicus	47763	1	1.813e-05	0	0	0	0	1	1.866e-05	0	0	1	3.792e-05
Streptomyces niveus	193462	2	3.626e-05	8	0.0001386	5	9.222e-05	5	9.33e-05	1	4.188e-05	1	3.792e-05
Streptomyces nodosus	40318	4	7.251e-05	0	0	3	5.533e-05	11	0.0002053	1	4.188e-05	5	0.0001896
Streptomyces parvulus	146923	7	0.0001269	1	1.732e-05	0	0	34	0.0006344	1	4.188e-05	9	0.0003413
Streptomyces rubrolavendulae	285473	6	0.0001088	4	6.929e-05	17	0.0003136	31	0.0005785	3	0.0001256	66	0.002503
Streptomyces sp. 11-1-2	1851167	1	1.813e-05	4	6.929e-05	3	5.533e-05	10	0.0001866	2	8.376e-05	1	3.792e-05
Streptomyces sp. FR-008	206662	4	7.251e-05	0	0	0	0	2	3.732e-05	0	0	0	0
Streptomyces sp. SCSIO 03032	1109743	0	0	0	0	0	0	1	1.866e-05	1	4.188e-05	0	0
Streptomyces sp. SM17	565560	2	3.626e-05	0	0	3	5.533e-05	3	5.598e-05	0	0	1	3.792e-05
Streptomyces sp. TLI_053	1855352	56	0.001015	0	0	2	3.689e-05	11	0.0002053	6	0.0002513	4	0.0001517
Streptomyces spongiicola	1690221	63	0.001142	108	0.001871	99	0.001826	70	0.001306	63	0.002638	61	0.002313
Sulfitobacter sp. SK011	1389004	4	7.251e-05	0	0	8	0.0001476	1	1.866e-05	1	4.188e-05	0	0
Sulfuricaulis limicola	1620215	3	5.438e-05	9	0.0001559	6	0.0001107	3	5.598e-05	1	4.188e-05	1	3.792e-05
Sulfuricella denitrificans	649841	2	3.626e-05	2	3.465e-05	1	1.844e-05	7	0.0001306	6	0.0002513	1	3.792e-05
Sulfuricurvum kujiense	148813	1	1.813e-05	1	1.732e-05	1	1.844e-05	0	0	0	0	0	0
Sulfuriferula sp. AH1	1985873	2	3.626e-05	0	0	2	3.689e-05	4	7.464e-05	7	0.0002931	5	0.0001896
Sulfurifustis variabilis	1675686	115	0.002085	77	0.001334	51	0.0009407	250	0.004665	109	0.004565	241	0.009139
Sulfurimonas denitrificans	39766	8	0.000145	10	0.0001732	9	0.000166	5	9.33e-05	3	0.0001256	1	3.792e-05
Sulfuritalea hydrogenivorans	748811	41	0.0007433	109	0.001888	35	0.0006456	24	0.0004478	39	0.001633	27	0.001024
Sutterella sp. 6FBBBH3	2259134	0	0	1	1.732e-05	5	9.222e-05	0	0	0	0	2	7.584e-05
Symbiobacterium thermophilum	2734	14	0.0002538	22	0.0003811	14	0.0002582	5	9.33e-05	4	0.0001675	0	0
Synechococcus sp. PCC 7336	195250	1	1.813e-05	0	0	0	0	0	0	0	0	0	0
Synechococcus sp. RCC307	316278	0	0	0	0	0	0	0	0	1	4.188e-05	0	0
Syntrophobacter fumaroxidans	119484	39	0.000707	62	0.001074	49	0.0009038	13	0.0002426	12	0.0005025	7	0.0002654
Syntrophomonas wolfei	863	10	0.0001813	6	0.0001039	3	5.533e-05	3	5.598e-05	3	0.0001256	2	7.584e-05
Syntrophothermus lipocalidus	86170	81	0.001468	132	0.002287	231	0.004261	57	0.001064	32	0.00134	54	0.002048
Syntrophus aciditrophicus	316277	7	0.0001269	8	0.0001386	5	9.222e-05	3	5.598e-05	1	4.188e-05	1	3.792e-05
Tatumella citrea	53336	0	0	1	1.732e-05	0	0	0	0	0	0	0	0
Taylorella equigenitalis	29575	0	0	0	0	0	0	1	1.866e-05	0	0	0	0
Tepidanaerobacter acetatoxydans	499229	0	0	1	1.732e-05	1	1.844e-05	0	0	0	0	0	0
Teredinibacter turnerae	2426	6	0.0001088	0	0	5	9.222e-05	0	0	0	0	0	0
Terribacillus aidingensis	586416	6	0.0001088	6	0.0001039	12	0.0002213	7	0.0001306	1	4.188e-05	6	0.0002275
Terriglobus roseus	392734	1	1.813e-05	1	1.732e-05	0	0	1	1.866e-05	0	0	1	3.792e-05
Terriglobus saanensis	870903	25	0.0004532	27	0.0004677	30	0.0005533	4	7.464e-05	2	8.376e-05	8	0.0003034
Tessaracoccus sp. Marseille-P5995	2161816	1	1.813e-05	0	0	0	0	0	0	0	0	0	0
Tetragenococcus halophilus	51669	1	1.813e-05	0	0	0	0	0	0	0	0	0	0
Thalassococcus sp. SH-1	2109625	46	0.0008339	31	0.000537	69	0.001273	40	0.0007464	27	0.001131	21	0.0007963
Thalassolituus oleivorans	187493	4	7.251e-05	5	8.661e-05	3	5.533e-05	3	5.598e-05	3	0.0001256	1	3.792e-05
Thalassotalea crassostreae	1763536	9	0.0001632	13	0.0002252	24	0.0004427	19	0.0003545	20	0.0008376	7	0.0002654
Thermacetogenium phaeum	85874	5	9.064e-05	2	3.465e-05	2	3.689e-05	2	3.732e-05	0	0	1	3.792e-05
Thermaerobacter marianensis	73919	153	0.002774	352	0.006098	88	0.001623	250	0.004665	85	0.00356	96	0.00364
Thermanaerovibrio velox	108007	3	5.438e-05	9	0.0001559	1	1.844e-05	7	0.0001306	3	0.0001256	3	0.0001138
Thermoanaerobacter kivui	2325	0	0	2	3.465e-05	0	0	0	0	0	0	0	0
Thermoanaerobacter wiegelii	46354	0	0	1	1.732e-05	0	0	0	0	0	0	0	0
Thermobacillus composti	377615	1	1.813e-05	1	1.732e-05	1	1.844e-05	1	1.866e-05	0	0	1	3.792e-05
Thermobaculum terrenum	166501	242	0.004387	455	0.007882	209	0.003855	133	0.002482	132	0.005528	98	0.003716
Thermobifida fusca	2021	0	0	3	5.197e-05	1	1.844e-05	0	0	1	4.188e-05	0	0
Thermobispora bispora	2006	477	0.008647	744	0.01289	1187	0.02189	363	0.006774	230	0.009632	227	0.008608
Thermococcus siculi	72803	0	0	0	0	1	1.844e-05	0	0	0	0	0	0
Thermocrinis ruber	75906	2	3.626e-05	1	1.732e-05	0	0	0	0	0	0	0	0
Thermodesulfatator indicus	171695	7	0.0001269	6	0.0001039	15	0.0002767	3	5.598e-05	0	0	0	0
Thermodesulfobacterium commune	1741	0	0	1	1.732e-05	0	0	0	0	0	0	0	0
Thermodesulfovibrio yellowstonii	28262	5	9.064e-05	8	0.0001386	6	0.0001107	2	3.732e-05	3	0.0001256	2	7.584e-05
Thermogutta terrifontis	1331910	15	0.0002719	19	0.0003291	31	0.0005718	10	0.0001866	17	0.0007119	9	0.0003413
Thermomicrobium roseum	500	6	0.0001088	5	8.661e-05	10	0.0001844	4	7.464e-05	7	0.0002931	6	0.0002275
Thermomonospora curvata	2020	37	0.0006707	41	0.0007102	157	0.002896	139	0.002594	46	0.001926	136	0.005157
Thermosediminibacter oceani	291990	2	3.626e-05	0	0	5	9.222e-05	2	3.732e-05	0	0	1	3.792e-05
Thermotoga naphthophila	93930	26	0.0004713	36	0.0006236	24	0.0004427	22	0.0004105	23	0.0009632	17	0.0006446
Thermotoga profunda	1508420	4	7.251e-05	0	0	0	0	0	0	0	0	0	0
Thermovibrio ammonificans	228745	0	0	0	0	1	1.844e-05	0	0	0	0	0	0
Thermovirga lienii	336261	2	3.626e-05	1	1.732e-05	1	1.844e-05	2	3.732e-05	0	0	1	3.792e-05
Thermus brockianus	56956	0	0	1	1.732e-05	0	0	0	0	0	0	0	0
Thermus oshimai	56957	0	0	0	0	2	3.689e-05	0	0	0	0	1	3.792e-05
Thioalkalivibrio paradoxus	108010	2	3.626e-05	1	1.732e-05	2	3.689e-05	2	3.732e-05	0	0	2	7.584e-05
Thioalkalivibrio sp. K90mix	396595	16	0.00029	24	0.0004157	13	0.0002398	12	0.0002239	5	0.0002094	7	0.0002654
Thioalkalivibrio sulfidiphilus	1033854	0	0	0	0	7	0.0001291	1	1.866e-05	0	0	2	7.584e-05
Thioalkalivibrio versutus	106634	5	9.064e-05	8	0.0001386	4	7.378e-05	3	5.598e-05	1	4.188e-05	3	0.0001138
Thiobacillus denitrificans	36861	0	0	0	0	9	0.000166	0	0	1	4.188e-05	1	3.792e-05
Thioflavicoccus mobilis	80679	0	0	0	0	1	1.844e-05	0	0	0	0	0	0
Thiohalobacter thiocyanaticus	585455	3	5.438e-05	4	6.929e-05	6	0.0001107	3	5.598e-05	4	0.0001675	0	0
Thiolapillus brandeum	1076588	76	0.001378	81	0.001403	191	0.003523	183	0.003415	87	0.003643	91	0.003451
Tistrella mobilis	171437	2	3.626e-05	3	5.197e-05	1	1.844e-05	0	0	2	8.376e-05	1	3.792e-05
Tolumonas auensis	43948	0	0	0	0	0	0	1	1.866e-05	0	0	0	0
Treponema brennaborense	81028	44	0.0007976	28	0.000485	16	0.0002951	18	0.0003359	12	0.0005025	10	0.0003792
Treponema caldarium	215591	5	9.064e-05	5	8.661e-05	4	7.378e-05	5	9.33e-05	0	0	5	0.0001896
Treponema primitia	88058	27	0.0004895	28	0.000485	5	9.222e-05	12	0.0002239	3	0.0001256	10	0.0003792
Treponema succinifaciens	167	3	5.438e-05	3	5.197e-05	7	0.0001291	1	1.866e-05	0	0	2	7.584e-05
Tropheryma whipplei	2039	2	3.626e-05	2	3.465e-05	2	3.689e-05	1	1.866e-05	4	0.0001675	1	3.792e-05
Truepera radiovictrix	332249	1507	0.02732	1147	0.01987	3547	0.06542	1710	0.03191	869	0.03639	1561	0.05919
Tumebacillus algifaecis	1214604	9	0.0001632	21	0.0003638	21	0.0003873	16	0.0002986	9	0.0003769	11	0.0004171
Tumebacillus avium	1903704	18	0.0003263	23	0.0003984	40	0.0007378	14	0.0002612	9	0.0003769	6	0.0002275
Turicibacter sp. H121	1712675	1	1.813e-05	0	0	2	3.689e-05	0	0	0	0	2	7.584e-05
Turneriella parva	29510	15	0.0002719	19	0.0003291	30	0.0005533	2	3.732e-05	3	0.0001256	3	0.0001138
Vagococcus penaei	633807	0	0	0	0	3	5.533e-05	1	1.866e-05	1	4.188e-05	0	0
Variovorax boronicumulans	436515	0	0	0	0	0	0	1	1.866e-05	0	0	1	3.792e-05
Variovorax sp. PMC12	2126319	4	7.251e-05	8	0.0001386	1	1.844e-05	3	5.598e-05	0	0	4	0.0001517
Veillonella rodentium	248315	73	0.001323	111	0.001923	21	0.0003873	21	0.0003919	7	0.0002931	19	0.0007205
Verminephrobacter eiseniae	364317	0	0	0	0	0	0	1	1.866e-05	0	0	0	0
Verrucomicrobia bacterium	2026799	65	0.001178	119	0.002061	83	0.001531	43	0.0008024	25	0.001047	28	0.001062
Verrucomicrobia bacterium IMCC26134	1637999	0	0	0	0	1	1.844e-05	0	0	1	4.188e-05	0	0
Verrucomicrobium sp. GAS474	1882831	595	0.01079	865	0.01498	546	0.01007	498	0.009293	335	0.01403	276	0.01047
Verrucomicrobium spinosum	2736	23	0.0004169	21	0.0003638	6	0.0001107	6	0.000112	2	8.376e-05	7	0.0002654
Verrucosispora maris	1003110	0	0	1	1.732e-05	0	0	0	0	0	0	0	0
Vibrio cholerae	666	16	0.00029	16	0.0002772	10	0.0001844	4	7.464e-05	4	0.0001675	3	0.0001138
Vibrio coralliilyticus	190893	11	0.0001994	3	5.197e-05	11	0.0002029	5	9.33e-05	4	0.0001675	5	0.0001896
Vibrio tapetis	52443	1	1.813e-05	0	0	0	0	1	1.866e-05	1	4.188e-05	0	0
Victivallales bacterium CCUG 44730	2094242	2	3.626e-05	1	1.732e-05	2	3.689e-05	1	1.866e-05	0	0	0	0
Virgibacillus pantothenticus	1473	1	1.813e-05	0	0	0	0	0	0	0	0	0	0
Virgibacillus sp. 6R	1911587	50	0.0009064	29	0.0005024	78	0.001439	17	0.0003172	9	0.0003769	12	0.000455
Virgibacillus sp. SK37	403957	10	0.0001813	16	0.0002772	55	0.001014	12	0.0002239	3	0.0001256	5	0.0001896
Vitreoscilla sp. C1	96942	9	0.0001632	15	0.0002598	4	7.378e-05	3	5.598e-05	0	0	2	7.584e-05
Vulgatibacter incomptus	1391653	18	0.0003263	15	0.0002598	27	0.000498	17	0.0003172	8	0.000335	20	0.0007584
Waddlia chondrophila	71667	1	1.813e-05	0	0	0	0	0	0	2	8.376e-05	1	3.792e-05
Wenzhouxiangella marina	1579979	16	0.00029	15	0.0002598	28	0.0005165	18	0.0003359	6	0.0002513	23	0.0008722
Woeseia oceani	1548547	486	0.00881	511	0.008852	1062	0.01959	883	0.01648	571	0.02391	435	0.0165
Wolbachia endosymbiont of Brugia malayi	80849	1	1.813e-05	0	0	0	0	0	0	0	0	0	0
Wolbachia endosymbiont of Drosophila simulans	77038	3	5.438e-05	8	0.0001386	10	0.0001844	6	0.000112	13	0.0005444	4	0.0001517
Wolbachia endosymbiont of Folsomia candida	169402	0	0	0	0	1	1.844e-05	0	0	0	0	0	0
Wolinella succinogenes	844	0	0	0	0	0	0	0	0	2	8.376e-05	0	0
Xanthobacter autotrophicus	280	210	0.003807	206	0.003569	279	0.005146	313	0.005841	227	0.009506	117	0.004437
Xanthomonas citri	346	45	0.0008158	71	0.00123	48	0.0008853	34	0.0006344	27	0.001131	31	0.001176
Xenorhabdus nematophila	628	0	0	0	0	0	0	0	0	0	0	1	3.792e-05
Xenorhabdus poinarii	40577	1515	0.02746	539	0.009337	1900	0.03505	960	0.01791	804	0.03367	880	0.03337
Xylanimonas cellulosilytica	186189	3	5.438e-05	0	0	2	3.689e-05	0	0	0	0	1	3.792e-05
Yersinia enterocolitica	630	9	0.0001632	14	0.0002425	3	5.533e-05	2	3.732e-05	2	8.376e-05	3	0.0001138
Yersinia entomophaga	935293	0	0	0	0	1	1.844e-05	0	0	0	0	0	0
Zobellella denitrificans	347534	9	0.0001632	3	5.197e-05	9	0.000166	6	0.000112	2	8.376e-05	0	0
Zobellia galactanivorans	63186	0	0	0	0	0	0	2	3.732e-05	0	0	0	0
Zymomonas mobilis	542	0	0	0	0	0	0	12	0.0002239	11	0.0004607	4	0.0001517
