# Supplementary material
Source: MDPI journal article supplement (https://www.mdpi.com/2077-0472/11/10/987)
Supplement: s1 [file s1 › Table S2 Statistical test on OTU relative abundance.xlsx]

## Sheet: exclude under 10
Name	t-test	Absolute_NG1	Relative_NG1	Absolute_NG2	Relative_NG2	Absolute_NG3	Relative_NG3	Absolute_OK1	Relative_OK1	Absolute_OK2	Relative_OK2	Absolute_OK3	Relative_OK3
[Polyangium] brachysporum	0.0442581	5	9.33e-05	5	0.0002094	15	0.0005688	33	0.0005982	66	0.001143	63	0.001162
Acetoanaerobium sticklandii	0.0456096	4	7.464e-05	2	8.376e-05	3	0.0001138	10	0.0001813	7	0.0001213	11	0.0002029
Acinetobacter sp. ADP1	0.0145223	932	0.01739	271	0.01135	426	0.01615	379	0.006871	283	0.004902	427	0.007876
Agromyces flavus	0.0424295	62	0.001157	26	0.001089	43	0.001631	27	0.0004895	31	0.000537	50	0.0009222
Akkermansia glycaniphila	0.0260392	0	0	0	0	0	0	12	0.0002175	6	0.0001039	5	9.222e-05
Aneurinibacillus sp. XH2	0.0371607	35	0.0006531	23	0.0009632	29	0.0011	13	0.0002357	27	0.0004677	29	0.0005349
Arachidicoccus sp. BS20	0.0406231	13	0.0002426	7	0.0002931	3	0.0001138	2	3.626e-05	3	5.197e-05	4	7.378e-05
Bacillus thuringiensis	0.0452729	19	0.0003545	22	0.0009213	21	0.0007963	61	0.001106	71	0.00123	78	0.001439
bacterium 2013Arg42i	0.0098687	12	0.0002239	2	8.376e-05	5	0.0001896	29	0.0005257	22	0.0003811	23	0.0004242
Bdellovibrio exovorus	0.0237736	4	7.464e-05	3	0.0001256	0	0	11	0.0001994	13	0.0002252	10	0.0001844
Candidatus Filomicrobium marinum	0.000565736	18	0.0003359	8	0.000335	10	0.0003792	10	0.0001813	11	0.0001906	11	0.0002029
Candidatus Gullanella endobia	0.0123601	17	0.0003172	12	0.0005025	12	0.000455	8	0.000145	10	0.0001732	11	0.0002029
Candidatus Koribacter versatilis	0.047292	66	0.001232	52	0.002178	51	0.001934	180	0.003263	400	0.006929	248	0.004574
Candidatus Pelagibacter sp. RS40	0.017047	247	0.004609	83	0.003476	83	0.003147	110	0.001994	91	0.001576	114	0.002103
Candidatus Protochlamydia amoebophila	0.0358245	0	0	2	8.376e-05	1	3.792e-05	9	0.0001632	8	0.0001386	15	0.0002767
Clostridium sp. BNL1100	0.0406987	13	0.0002426	3	0.0001256	2	7.584e-05	23	0.0004169	47	0.0008142	62	0.001144
Collimonas fungivorans	0.0181678	1	1.866e-05	0	0	0	0	40	0.0007251	71	0.00123	28	0.0005165
Dehalobacter restrictus	0.00579556	10	0.0001866	5	0.0002094	10	0.0003792	47	0.000852	65	0.001126	42	0.0007747
Desulfotomaculum ferrireducens	0.00443213	216	0.004031	133	0.00557	114	0.004323	59	0.00107	91	0.001576	106	0.001955
Ethanoligenens harbinense	0.0025705	1	1.866e-05	1	4.188e-05	0	0	12	0.0002175	10	0.0001732	8	0.0001476
Gemmatimonas phototrophica	0.0124538	354	0.006606	184	0.007706	248	0.009404	169	0.003064	274	0.004746	190	0.003505
Gilliamella apicola	0.0135412	14	0.0002612	8	0.000335	6	0.0002275	68	0.001233	39	0.0006756	54	0.000996
Granulosicoccus antarcticus	0.0335325	18	0.0003359	14	0.0005863	16	0.0006067	67	0.001215	86	0.00149	45	0.00083
Isosphaera pallida	0.0443742	29	0.0005411	23	0.0009632	16	0.0006067	71	0.001287	131	0.002269	78	0.001439
Legionella oakridgensis	0.0179413	2	3.732e-05	1	4.188e-05	3	0.0001138	30	0.0005438	32	0.0005543	14	0.0002582
Legionella pneumophila	0.0302952	14	0.0002612	4	0.0001675	7	0.0002654	7	0.0001269	2	3.465e-05	6	0.0001107
Luteimonas sp. 100111	0.00233886	157	0.00293	71	0.002973	49	0.001858	4	7.251e-05	5	8.661e-05	4	7.378e-05
Methylobacterium radiotolerans	0.00437215	0	0	0	0	0	0	6	0.0001088	11	0.0001906	7	0.0001291
Methylocystis sp. SC2	0.0467691	70	0.001306	41	0.001717	59	0.002237	127	0.002302	184	0.003187	177	0.003265
Micavibrio aeruginosavorus	0.00281395	226	0.004217	112	0.00469	143	0.005423	73	0.001323	74	0.001282	124	0.002287
Muricauda lutaonensis	0.0343116	28	0.0005225	16	0.00067	19	0.0007205	3	5.438e-05	12	0.0002079	24	0.0004427
Nitratireductor sp. OM-1	0.00463601	20	0.0003732	11	0.0004607	11	0.0004171	3	5.438e-05	8	0.0001386	11	0.0002029
Nitrospirillum amazonense	0.0485123	1001	0.01868	239	0.01001	336	0.01274	386	0.006997	185	0.003205	386	0.00712
Pararhodospirillum photometricum	0.0347481	19	0.0003545	14	0.0005863	15	0.0005688	9	0.0001632	17	0.0002945	14	0.0002582
Phycisphaerae bacterium L21-RPul-D3	0.00860352	49	0.0009143	21	0.0008794	28	0.001062	31	0.000562	34	0.000589	19	0.0003505
Pseudoflavitalea sp. 5GH32-13	0.0394219	131	0.002444	55	0.002303	44	0.001668	85	0.001541	66	0.001143	41	0.0007562
Pseudothermotoga hypogea	0.0370346	333	0.006214	336	0.01407	175	0.006636	946	0.01715	1663	0.02881	1118	0.02062
Salinibacter ruber	0.0266754	40	0.0007464	32	0.00134	12	0.000455	150	0.002719	123	0.002131	218	0.004021
Simkania negevensis	0.0176397	1	1.866e-05	0	0	3	0.0001138	16	0.00029	10	0.0001732	13	0.0002398
Sinorhizobium fredii	0.0351657	17	0.0003172	12	0.0005025	4	0.0001517	1	1.813e-05	0	0	0	0
Sphingomonas sp. KC8	0.0323529	153	0.002855	92	0.003853	89	0.003375	78	0.001414	98	0.001698	140	0.002582
Steroidobacter denitrificans	0.0359575	898	0.01676	616	0.0258	729	0.02764	748	0.01356	769	0.01332	475	0.008761
Stigmatella aurantiaca	0.0498773	5	9.33e-05	2	8.376e-05	2	7.584e-05	13	0.0002357	22	0.0003811	9	0.000166
Streptococcus pyogenes	0.00464751	14	0.0002612	10	0.0004188	9	0.0003413	4	7.251e-05	3	5.197e-05	5	9.222e-05
Sulfurifustis variabilis	0.0390803	250	0.004665	109	0.004565	241	0.009139	115	0.002085	77	0.001334	51	0.0009407
Sulfurimonas denitrificans	0.0482674	5	9.33e-05	3	0.0001256	1	3.792e-05	8	0.000145	10	0.0001732	9	0.000166
Symbiobacterium thermophilum	0.0300407	5	9.33e-05	4	0.0001675	0	0	14	0.0002538	22	0.0003811	14	0.0002582
Syntrophobacter fumaroxidans	0.014344	13	0.0002426	12	0.0005025	7	0.0002654	39	0.000707	62	0.001074	49	0.0009038
Syntrophus aciditrophicus	0.00779787	3	5.598e-05	1	4.188e-05	1	3.792e-05	7	0.0001269	8	0.0001386	5	9.222e-05
Terriglobus saanensis	0.014097	4	7.464e-05	2	8.376e-05	8	0.0003034	25	0.0004532	27	0.0004677	30	0.0005533
Turneriella parva	0.0316002	2	3.732e-05	3	0.0001256	3	0.0001138	15	0.0002719	19	0.0003291	30	0.0005533
Vibrio cholerae	0.0368691	4	7.464e-05	4	0.0001675	3	0.0001138	16	0.00029	16	0.0002772	10	0.0001844
Zymomonas mobilis	0.0404543	12	0.0002239	11	0.0004607	4	0.0001517	0	0	0	0	0	0
