# Supplementary material
Source: MDPI journal article supplement (https://www.mdpi.com/2077-0472/11/10/987)
Supplement: s1 [file s1 › Table S4 Beta diversity correlation.xlsx]

## Sheet: Sheet1
											unweighted unifrac beta				weighted unifrac beta
												Spearman Rho	p Value			Spearman Rho	p Value
											Cu	-0.081861	0.315		Cu	-0.0871875	0.346
											P	0.0331028	0.678		P	-0.0265328	0.779
											organic matter	0.160009	0.022		Mn	0.0708896	0.326
											Mn	0.193277	0.02		Zn	0.188041	0.018
											Zn	0.223433	0.007		organic matter	0.196011	0.014
											K	0.303506	0.004		Ca	0.306583	0.004
Spearman		Test Statistics ®	p value				Test Statistics ®	p value		unweighted unifrac beta	Conductivity	0.331478	0.002		Mg	0.424733	0.001
Shannon	pH	0.76	0		Faith PD	pH	0.7578	0			Ca	0.418207	0.001		Conductivity	0.453865	0.001
	Conductivity	-0.4169	0.0273			Conductivity	-0.2494	0.2006			Mg	0.529172	0.001		Fe	0.462355	0.001
	organic	0.6149	0.0005			organic	0.4697	0.0117			Fe	0.589738	0.001		K	0.472868	0.001
	P	0.478	0.0101			P	0.5248	0.0041			pH	0.834979	0.001		pH	0.773559	0.001
	K	-0.5739	0.0014			K	-0.5235	0.0042
	Ca	0.736	0			Ca	0.7647	0
	Mg	0.6896	0			Mg	0.7586	0
	Fe	-0.713	0			Fe	-0.7319	0
	Mn	0.4856	0.0088			Mn	0.6124	0.0005
	Cu	-0.3721	0.0512			Cu	-0.3094	0.1092
	Zn	0.4369	0.0201			Zn	0.4826	0.0093
