# Supplementary material
Source: MDPI journal article supplement (https://www.mdpi.com/2077-0472/11/10/987)
Supplement: s1 [file s1 › Table S5 Statistical test on Bacillus genus.xlsx]

## Sheet: 工作表1
name	taxID	t-test	Absolute.OK1	Relative.OK1	Absolute.OK2	Relative.OK2	Absolute.OK3	Relative.OK3	Absolute.NG1	Relative.NG1	Absolute.NG2	Relative.NG2	Absolute.NG3	Relative.NG3
Bacillus sp. Y1	352858	0.0114793	6	0.0001088	4	6.929e-05	5	9.222e-05	2	3.732e-05	1	4.188e-05	1	3.792e-05
Bacillus thuringiensis	1428	0.0452729	61	0.001106	71	0.00123	78	0.001439	19	0.0003545	22	0.0009213	21	0.0007963
Bacillus coagulans	1398	0.0608125	36	0.0006526	29	0.0005024	66	0.001217	12	0.0002239	2	8.376e-05	8	0.0003034
Bacillus atrophaeus	1452	0.115306	1	1.813e-05	1	1.732e-05	2	3.689e-05	1	1.866e-05	0	0	0	0
Bacillus sp. 1NLA3E	666686	0.132722	8	0.000145	21	0.0003638	23	0.0004242	7	0.0001306	5	0.0002094	1	3.792e-05
Bacillus thermoamylovorans	35841	0.17426	10	0.0001813	43	0.0007449	27	0.000498	6	0.000112	5	0.0002094	7	0.0002654
Bacillus subtilis	1423	0.255443	1	1.813e-05	0	0	1	1.844e-05	1	1.866e-05	4	0.0001675	1	3.792e-05
Bacillus cereus	1396	0.267783	20	0.0003626	20	0.0003465	28	0.0005165	9	0.0001679	7	0.0002931	11	0.0004171
Bacillus halodurans	86665	0.284235	2	3.626e-05	1	1.732e-05	2	3.689e-05	0	0	0	0	1	3.792e-05
Bacillus pseudomycoides	64104	0.29266	3	5.438e-05	3	5.197e-05	6	0.0001107	5	9.33e-05	2	8.376e-05	7	0.0002654
Bacillus anthracis	1392	0.300506	10	0.0001813	11	0.0001906	31	0.0005718	12	0.0002239	15	0.0006282	32	0.001213
Bacillus megaterium	1404	0.363108	67	0.001215	50	0.0008661	126	0.002324	41	0.0007651	19	0.0007957	36	0.001365
Bacillus butanolivorans	421767	0.373901	0	0	0	0	1	1.844e-05	0	0	0	0	0	0
Bacillus lehensis	300825	0.373901	1	1.813e-05	0	0	0	0	0	0	0	0	0	0
Bacillus muralis	264697	0.373901	0	0	0	0	0	0	0	0	1	4.188e-05	0	0
Bacillus safensis	561879	0.373901	0	0	0	0	0	0	1	1.866e-05	0	0	0	0
Bacillus sp. ZY-1-1	2093834	0.373901	0	0	0	0	1	1.844e-05	0	0	0	0	0	0
Bacillus clausii	79880	0.379452	12	0.0002175	12	0.0002079	51	0.0009407	5	9.33e-05	8	0.000335	5	0.0001896
Bacillus licheniformis	1402	0.534687	1	1.813e-05	7	0.0001213	5	9.222e-05	2	3.732e-05	2	8.376e-05	7	0.0002654
Bacillus sp. DM2	2267265	0.584977	2	3.626e-05	2	3.465e-05	2	3.689e-05	2	3.732e-05	0	0	4	0.0001517
Bacillus sp. Lzh-5	2049935	0.587397	1	1.813e-05	0	0	1	1.844e-05	1	1.866e-05	1	4.188e-05	0	0
Bacillus sp. FJAT-45348	2011012	0.588227	1	1.813e-05	0	0	3	5.533e-05	2	3.732e-05	0	0	0	0
Bacillus cellulosilyticus	1413	0.596298	1	1.813e-05	0	0	3	5.533e-05	0	0	0	0	1	3.792e-05
Bacillus velezensis	492670	0.643332	2	3.626e-05	4	6.929e-05	4	7.378e-05	4	7.464e-05	1	4.188e-05	1	3.792e-05
Bacillus pumilus	1408	0.668101	0	0	0	0	1	1.844e-05	0	0	0	0	1	3.792e-05
Bacillus oceanisediminis	665099	0.721789	20	0.0003626	20	0.0003465	26	0.0004796	14	0.0002612	13	0.0005444	7	0.0002654
Bacillus altitudinis	293387	0.80635	7	0.0001269	2	3.465e-05	1	1.844e-05	3	5.598e-05	1	4.188e-05	3	0.0001138
Bacillus amyloliquefaciens	1390	0.873342	3	5.438e-05	1	1.732e-05	1	1.844e-05	0	0	0	0	2	7.584e-05
Bacillus horikoshii	79883	0.879878	3	5.438e-05	5	8.661e-05	15	0.0002767	5	9.33e-05	5	0.0002094	2	7.584e-05
